# Supplementary material for: A regulatory pathway that selectively up-regulates elongasome function in the absence of class A PBPs
Source: eLife. 2020 Sep 8;9:e57902. doi: 10.7554/eLife.57902 (PMC7478892; doi:10.7554/eLife.57902)
Supplement: Figure 2—source data 1. [file elife-57902-fig2-data1.xlsx]

## Sheet: 2A
Time	0 µg/mL Moenomycin																	0.4 µg/mL Moenomycin
(hours)	WT_BR 1	WT_BR 2	AVG	SD	ΔecsA_BR 1	ΔecsA_BR 2	AVG	SD	ΔrasP_BR 1	ΔrasP_BR 2	AVG	SD	ΔecsAΔrasP_BR 1	ΔecsAΔrasP_BR 2	AVG	SD		WT_BR 1	WT_BR 2	AVG	SD	ΔecsA_BR 1	ΔecsA_BR 2	AVG	SD	ΔrasP_BR 1	ΔrasP_BR 2	AVG	SD	ΔecsAΔrasP_BR 1	ΔecsAΔrasP_BR 2	AVG	SD
0	0.088	0.088	0.088	0	0.105	0.1085	0.10675	0.00247487	0.116	0.107	0.1115	0.00636396	0.088	0.088	0.088	0		0.089	0.089	0.089	0	0.09	0.09	0.09	0	0.087	0.094	0.0905	0.00494975	0.086	0.088	0.087	0.00141421
0.25	0.111	0.103	0.107	0.00565685	0.092	0.092	0.092	0	0.0955	0.098	0.09675	0.00176777	0.093	0.087	0.09	0.00424264		0.113	0.091	0.102	0.0155563	0.089	0.09	0.0895	0.000707107	0.089	0.087	0.088	0.00141421	0.087	0.088	0.0875	0.000707107
0.5	0.117	0.107	0.112	0.00707107	0.095	0.094	0.0945	0.000707107	0.096	0.105	0.1005	0.00636396	0.107	0.089	0.098	0.0127279		0.122	0.088	0.105	0.0240416	0.09	0.091	0.0905	0.000707107	0.091	0.088	0.0895	0.00212132	0.092	0.09	0.091	0.00141421
0.75	0.131	0.119	0.125	0.00848528	0.1	0.098	0.099	0.00141421	0.0995	0.109	0.10425	0.00671751	0.11	0.092	0.101	0.0127279		0.134	0.094	0.114	0.0282843	0.092	0.09	0.091	0.00141421	0.092	0.089	0.0905	0.00212132	0.094	0.091	0.0925	0.00212132
1	0.126	0.116	0.121	0.00707107	0.1075	0.1045	0.106	0.00212132	0.1065	0.11	0.10825	0.00247487	0.115	0.096	0.1055	0.013435		0.129	0.093	0.111	0.0254558	0.091	0.093	0.092	0.00141421	0.093	0.089	0.091	0.00282843	0.096	0.092	0.094	0.00282843
1.25	0.133	0.126	0.1295	0.00494975	0.12	0.116	0.118	0.00282843	0.115	0.125	0.12	0.00707107	0.114	0.101	0.1075	0.00919239		0.134	0.096	0.115	0.0268701	0.091	0.092	0.0915	0.000707107	0.091	0.089	0.09	0.00141421	0.095	0.093	0.094	0.00141421
1.5	0.142	0.131	0.1365	0.00777817	0.143	0.1375	0.14025	0.00388909	0.134	0.135	0.1345	0.000707107	0.12	0.108	0.114	0.00848528		0.137	0.099	0.118	0.0268701	0.09	0.092	0.091	0.00141421	0.091	0.089	0.09	0.00141421	0.094	0.092	0.093	0.00141421
1.75	0.152	0.134	0.143	0.0127279	0.184	0.174	0.179	0.00707107	0.163	0.162	0.1625	0.000707107	0.131	0.122	0.1265	0.00636396		0.135	0.099	0.117	0.0254558	0.09	0.091	0.0905	0.000707107	0.092	0.088	0.09	0.00282843	0.093	0.09	0.0915	0.00212132
2	0.192	0.16	0.176	0.0226274	0.256	0.238	0.247	0.0127279	0.21	0.215	0.2125	0.00353553	0.155	0.149	0.152	0.00424264		0.152	0.105	0.1285	0.033234	0.093	0.096	0.0945	0.00212132	0.092	0.089	0.0905	0.00212132	0.095	0.093	0.094	0.00141421
2.25	0.245	0.192	0.2185	0.0374767	0.3355	0.3215	0.3285	0.00989949	0.2815	0.276	0.27875	0.00388909	0.191	0.19	0.1905	0.000707107		0.164	0.111	0.1375	0.0374767	0.092	0.095	0.0935	0.00212132	0.093	0.09	0.0915	0.00212132	0.096	0.094	0.095	0.00141421
2.5	0.319	0.249	0.284	0.0494975	0.403	0.391	0.397	0.00848528	0.3575	0.36	0.35875	0.00176777	0.251	0.256	0.2535	0.00353553		0.191	0.119	0.155	0.0509117	0.093	0.094	0.0935	0.000707107	0.097	0.09	0.0935	0.00494975	0.098	0.094	0.096	0.00282843
2.75	0.422	0.32	0.371	0.0721249	0.4505	0.4405	0.4455	0.00707107	0.42	0.431	0.4255	0.00777817	0.329	0.337	0.333	0.00565685		0.224	0.135	0.1795	0.0629325	0.094	0.095	0.0945	0.000707107	0.094	0.09	0.092	0.00282843	0.097	0.095	0.096	0.00141421
3	0.49	0.419	0.4545	0.0502046	0.482	0.469	0.4755	0.00919239	0.4645	0.475	0.46975	0.00742462	0.414	0.404	0.409	0.00707107		0.277	0.159	0.218	0.0834386	0.094	0.094	0.094	0	0.098	0.092	0.095	0.00424264	0.102	0.097	0.0995	0.00353553
3.25	0.531	0.477	0.504	0.0381838	0.5195	0.504	0.51175	0.0109602	0.501	0.517	0.509	0.0113137	0.469	0.442	0.4555	0.0190919		0.322	0.188	0.255	0.0947523	0.093	0.094	0.0935	0.000707107	0.095	0.092	0.0935	0.00212132	0.098	0.096	0.097	0.00141421
3.5	0.575	0.518	0.5465	0.0403051	0.552	0.5325	0.54225	0.0137886	0.5345	0.552	0.54325	0.0123744	0.497	0.463	0.48	0.0240416		0.387	0.223	0.305	0.115966	0.093	0.096	0.0945	0.00212132	0.099	0.092	0.0955	0.00494975	0.1	0.094	0.097	0.00424264
3.75	0.618	0.546	0.582	0.0509117	0.5805	0.5625	0.5715	0.0127279	0.5635	0.579	0.57125	0.0109602	0.528	0.493	0.5105	0.0247487		0.415	0.271	0.343	0.101823	0.094	0.095	0.0945	0.000707107	0.1	0.092	0.096	0.00565685	0.103	0.098	0.1005	0.00353553
4	0.662	0.586	0.624	0.0537401	0.609	0.588	0.5985	0.0148492	0.5955	0.617	0.60625	0.0152028	0.555	0.513	0.534	0.0296985		0.45	0.341	0.3955	0.0770746	0.094	0.094	0.094	0	0.1	0.092	0.096	0.00565685	0.104	0.098	0.101	0.00424264
4.25	0.707	0.618	0.6625	0.0629325	0.6305	0.61	0.62025	0.0144957	0.615	0.644	0.6295	0.0205061	0.586	0.537	0.5615	0.0346482		0.48	0.376	0.428	0.0735391	0.094	0.096	0.095	0.00141421	0.1	0.092	0.096	0.00565685	0.105	0.1	0.1025	0.00353553
4.5	0.741	0.652	0.6965	0.0629325	0.65	0.6275	0.63875	0.0159099	0.6355	0.664	0.64975	0.0201525	0.615	0.559	0.587	0.039598		0.505	0.412	0.4585	0.0657609	0.094	0.095	0.0945	0.000707107	0.101	0.091	0.096	0.00707107	0.103	0.098	0.1005	0.00353553
4.75	0.771	0.68	0.7255	0.0643467	0.672	0.6505	0.66125	0.0152028	0.6575	0.687	0.67225	0.0208597	0.64	0.581	0.6105	0.0417193		0.523	0.439	0.481	0.059397	0.094	0.095	0.0945	0.000707107	0.1	0.091	0.0955	0.00636396	0.103	0.097	0.1	0.00424264
5	0.807	0.709	0.758	0.0692965	0.692	0.666	0.679	0.0183848	0.677	0.704	0.6905	0.0190919	0.667	0.603	0.635	0.0452548		0.543	0.468	0.5055	0.053033	0.094	0.095	0.0945	0.000707107	0.101	0.091	0.096	0.00707107	0.103	0.098	0.1005	0.00353553
5.25	0.835	0.735	0.785	0.0707107	0.7095	0.683	0.69625	0.0187383	0.694	0.723	0.7085	0.0205061	0.688	0.623	0.6555	0.0459619		0.57	0.491	0.5305	0.0558614	0.094	0.096	0.095	0.00141421	0.102	0.091	0.0965	0.00777817	0.104	0.098	0.101	0.00424264
5.5	0.862	0.755	0.8085	0.0756604	0.7335	0.71	0.72175	0.016617	0.719	0.743	0.731	0.0169706	0.71	0.642	0.676	0.0480833		0.597	0.509	0.553	0.0622254	0.094	0.094	0.094	0	0.101	0.091	0.096	0.00707107	0.103	0.098	0.1005	0.00353553
5.75	0.893	0.781	0.837	0.079196	0.75	0.729	0.7395	0.0148492	0.737	0.757	0.747	0.0141421	0.729	0.66	0.6945	0.0487904		0.631	0.527	0.579	0.0735391	0.096	0.095	0.0955	0.000707107	0.101	0.091	0.096	0.00707107	0.102	0.098	0.1	0.00282843
6	0.915	0.797	0.856	0.0834386	0.7625	0.741	0.75175	0.0152028	0.7465	0.773	0.75975	0.0187383	0.742	0.677	0.7095	0.0459619		0.663	0.55	0.6065	0.0799031	0.094	0.094	0.094	0	0.101	0.091	0.096	0.00707107	0.103	0.098	0.1005	0.00353553
6.25	0.941	0.817	0.879	0.0876812	0.7815	0.761	0.77125	0.0144957	0.766	0.79	0.778	0.0169706	0.76	0.697	0.7285	0.0445477		0.696	0.578	0.637	0.0834386	0.093	0.094	0.0935	0.000707107	0.102	0.091	0.0965	0.00777817	0.103	0.098	0.1005	0.00353553
6.5	0.954	0.835	0.8945	0.0841457	0.793	0.7795	0.78625	0.00954594	0.7825	0.806	0.79425	0.016617	0.776	0.713	0.7445	0.0445477		0.731	0.608	0.6695	0.0869741	0.094	0.095	0.0945	0.000707107	0.1	0.091	0.0955	0.00636396	0.101	0.098	0.0995	0.00212132
6.75	0.976	0.851	0.9135	0.0883883	0.8075	0.792	0.79975	0.0109602	0.7975	0.815	0.80625	0.0123744	0.793	0.726	0.7595	0.0473762		0.762	0.638	0.7	0.0876812	0.093	0.094	0.0935	0.000707107	0.096	0.09	0.093	0.00424264	0.096	0.097	0.0965	0.000707107
7	1.004	0.865	0.9345	0.0982878	0.8255	0.8055	0.8155	0.0141421	0.8105	0.821	0.81575	0.00742462	0.814	0.744	0.779	0.0494975		0.795	0.667	0.731	0.0905097	0.094	0.094	0.094	0	0.096	0.091	0.0935	0.00353553	0.097	0.098	0.0975	0.000707107
7.25	1.032	0.879	0.9555	0.108187	0.8455	0.824	0.83475	0.0152028	0.8255	0.83	0.82775	0.00318198	0.836	0.756	0.796	0.0565685		0.831	0.696	0.7635	0.0954594	0.096	0.096	0.096	0	0.1	0.091	0.0955	0.00636396	0.102	0.102	0.102	0
7.5	1.054	0.89	0.972	0.115966	0.8625	0.843	0.85275	0.0137886	0.8435	0.847	0.84525	0.00247487	0.848	0.775	0.8115	0.0516188		0.866	0.727	0.7965	0.0982878	0.096	0.095	0.0955	0.000707107	0.096	0.09	0.093	0.00424264	0.097	0.099	0.098	0.00141421
7.75	1.076	0.898	0.987	0.125865	0.874	0.858	0.866	0.0113137	0.858	0.86	0.859	0.00141421	0.873	0.788	0.8305	0.0601041		0.902	0.763	0.8325	0.0982878	0.091	0.093	0.092	0.00141421	0.1	0.09	0.095	0.00707107	0.102	0.104	0.103	0.00141421
8	1.094	0.914	1.004	0.127279	0.8825	0.8675	0.875	0.0106066	0.8685	0.865	0.86675	0.00247487	0.887	0.801	0.844	0.0608112		0.929	0.793	0.861	0.0961665	0.094	0.096	0.095	0.00141421	0.095	0.09	0.0925	0.00353553	0.096	0.103	0.0995	0.00494975
8.25	1.104	0.933	1.0185	0.120915	0.8905	0.8755	0.883	0.0106066	0.877	0.87	0.8735	0.00494975	0.904	0.814	0.859	0.0636396		0.949	0.825	0.887	0.0876812	0.096	0.098	0.097	0.00141421	0.095	0.089	0.092	0.00424264	0.095	0.104	0.0995	0.00636396
8.5	1.12	0.958	1.039	0.114551	0.8985	0.8845	0.8915	0.00989949	0.886	0.884	0.885	0.00141421	0.923	0.833	0.878	0.0636396		0.974	0.86	0.917	0.0806102	0.096	0.098	0.097	0.00141421	0.095	0.09	0.0925	0.00353553	0.096	0.109	0.1025	0.00919239
8.75	1.135	0.977	1.056	0.111723	0.9065	0.8935	0.9	0.00919239	0.893	0.887	0.89	0.00424264	0.937	0.852	0.8945	0.0601041		0.996	0.888	0.942	0.0763675	0.096	0.098	0.097	0.00141421	0.096	0.09	0.093	0.00424264	0.096	0.117	0.1065	0.0148492
9	1.153	1	1.0765	0.108187	0.912	0.9015	0.90675	0.00742462	0.8985	0.885	0.89175	0.00954594	0.951	0.864	0.9075	0.0615183		1.026	0.919	0.9725	0.0756604	0.096	0.097	0.0965	0.000707107	0.101	0.09	0.0955	0.00777817	0.1	0.125	0.1125	0.0176777
9.25	1.171	1.016	1.0935	0.109602	0.918	0.908	0.913	0.00707107	0.9035	0.885	0.89425	0.0130815	0.967	0.876	0.9215	0.0643467		1.052	0.943	0.9975	0.0770746	0.096	0.098	0.097	0.00141421	0.1	0.091	0.0955	0.00636396	0.101	0.135	0.118	0.0240416
9.5	1.183	1.026	1.1045	0.111016	0.92	0.915	0.9175	0.00353553	0.9115	0.889	0.90025	0.0159099	0.969	0.881	0.925	0.0622254		1.074	0.963	1.0185	0.0784889	0.093	0.1	0.0965	0.00494975	0.097	0.09	0.0935	0.00494975	0.096	0.149	0.1225	0.0374767
9.75	1.193	1.04	1.1165	0.108187	0.925	0.9185	0.92175	0.00459619	0.9155	0.895	0.90525	0.0144957	0.98	0.891	0.9355	0.0629325		1.096	0.988	1.042	0.0763675	0.099	0.104	0.1015	0.00353553	0.097	0.09	0.0935	0.00494975	0.096	0.164	0.13	0.0480833
10	1.206	1.053	1.1295	0.108187	0.9265	0.9225	0.9245	0.00282843	0.921	0.888	0.9045	0.0233345	0.988	0.893	0.9405	0.0671751		1.119	1.015	1.067	0.0735391	0.099	0.107	0.103	0.00565685	0.096	0.089	0.0925	0.00494975	0.096	0.183	0.1395	0.0615183
10.25	1.222	1.065	1.1435	0.111016	0.928	0.925	0.9265	0.00212132	0.9255	0.888	0.90675	0.0265165	1	0.899	0.9495	0.0714178		1.149	1.045	1.097	0.0735391	0.1	0.107	0.1035	0.00494975	0.102	0.091	0.0965	0.00777817	0.101	0.206	0.1535	0.0742462
10.5	1.233	1.076	1.1545	0.111016	0.929	0.925	0.927	0.00282843	0.93	0.887	0.9085	0.0304056	1.006	0.902	0.954	0.0735391		1.165	1.068	1.1165	0.0685894	0.101	0.113	0.107	0.00848528	0.099	0.09	0.0945	0.00636396	0.096	0.223	0.1595	0.0898026
10.75	1.246	1.088	1.167	0.111723	0.927	0.923	0.925	0.00282843	0.929	0.881	0.905	0.0339411	1.016	0.904	0.96	0.079196		1.189	1.094	1.1415	0.0671751	0.104	0.118	0.111	0.00989949	0.105	0.091	0.098	0.00989949	0.1	0.24	0.17	0.0989949
11	1.254	1.098	1.176	0.110309	0.922	0.92	0.921	0.00141421	0.927	0.877	0.902	0.0353553	1.016	0.907	0.9615	0.0770746		1.207	1.117	1.162	0.0636396	0.106	0.124	0.115	0.0127279	0.11	0.091	0.1005	0.013435	0.096	0.245	0.1705	0.105359
11.25	1.258	1.112	1.185	0.103238	0.92	0.92	0.92	0	0.922	0.874	0.898	0.0339411	1.018	0.911	0.9645	0.0756604		1.223	1.141	1.182	0.0579828	0.111	0.129	0.12	0.0127279	0.108	0.09	0.099	0.0127279	0.095	0.239	0.167	0.101823
11.5	1.26	1.12	1.19	0.0989949	0.9205	0.9195	0.92	0.000707107	0.913	0.865	0.889	0.0339411	1.02	0.912	0.966	0.0763675		1.233	1.163	1.198	0.0494975	0.118	0.142	0.13	0.0169706	0.103	0.09	0.0965	0.00919239	0.096	0.239	0.1675	0.101116
11.75	1.268	1.135	1.2015	0.0940452	0.918	0.9165	0.91725	0.00106066	0.9105	0.857	0.88375	0.0378302	1.02	0.918	0.969	0.0721249		1.248	1.187	1.2175	0.0431335	0.123	0.155	0.139	0.0226274	0.115	0.092	0.1035	0.0162635	0.097	0.242	0.1695	0.10253
12	1.268	1.141	1.2045	0.0898026	0.9105	0.9105	0.9105	0	0.9015	0.848	0.87475	0.0378302	1.022	0.919	0.9705	0.072832		1.254	1.205	1.2295	0.0346482	0.134	0.171	0.1525	0.026163	0.145	0.095	0.12	0.0353553	0.1	0.24	0.17	0.0989949
12.25	1.28	1.155	1.2175	0.0883883	0.9045	0.906	0.90525	0.00106066	0.8935	0.842	0.86775	0.036416	1.02	0.914	0.967	0.0749533		1.268	1.225	1.2465	0.0304056	0.15	0.195	0.1725	0.0318198	0.161	0.095	0.128	0.046669	0.099	0.24	0.1695	0.0997021
12.5	1.286	1.161	1.2235	0.0883883	0.896	0.894	0.895	0.00141421	0.878	0.831	0.8545	0.033234	1.014	0.911	0.9625	0.072832		1.278	1.238	1.258	0.0282843	0.169	0.213	0.191	0.0311127	0.206	0.097	0.1515	0.0770746	0.101	0.236	0.1685	0.0954594
12.75	1.286	1.163	1.2245	0.0869741	0.8855	0.8855	0.8855	0	0.8675	0.823	0.84525	0.0314663	1.01	0.907	0.9585	0.072832		1.284	1.246	1.265	0.0268701	0.188	0.25	0.219	0.0438406	0.201	0.096	0.1485	0.0742462	0.102	0.237	0.1695	0.0954594
13	1.296	1.171	1.2335	0.0883883	0.874	0.8735	0.87375	0.000353553	0.8465	0.815	0.83075	0.0222739	1.008	0.903	0.9555	0.0742462		1.302	1.262	1.282	0.0282843	0.216	0.281	0.2485	0.0459619	0.157	0.103	0.13	0.0381838	0.109	0.245	0.177	0.0961665
13.25	1.294	1.173	1.2335	0.0855599	0.862	0.86	0.861	0.00141421	0.833	0.796	0.8145	0.026163	0.99	0.888	0.939	0.0721249		1.306	1.27	1.288	0.0254558	0.259	0.313	0.286	0.0381838	0.19	0.104	0.147	0.0608112	0.106	0.249	0.1775	0.101116
13.5	1.298	1.175	1.2365	0.0869741	0.851	0.8465	0.84875	0.00318198	0.813	0.788	0.8005	0.0176777	0.984	0.886	0.935	0.0692965		1.314	1.278	1.296	0.0254558	0.289	0.321	0.305	0.0226274	0.27	0.11	0.19	0.113137	0.112	0.257	0.1845	0.10253
13.75	1.302	1.183	1.2425	0.0841457	0.8365	0.834	0.83525	0.00176777	0.7925	0.778	0.78525	0.010253	0.954	0.876	0.915	0.0551543		1.324	1.29	1.307	0.0240416	0.299	0.344	0.3215	0.0318198	0.225	0.116	0.1705	0.0770746	0.112	0.268	0.19	0.110309
14	1.308	1.189	1.2485	0.0841457	0.8265	0.819	0.82275	0.0053033	0.777	0.764	0.7705	0.00919239	0.949	0.87	0.9095	0.0558614		1.336	1.302	1.319	0.0240416	0.32	0.361	0.3405	0.0289914	0.18	0.123	0.1515	0.0403051	0.123	0.284	0.2035	0.113844
14.25	1.308	1.191	1.2495	0.0827315	0.8155	0.811	0.81325	0.00318198	0.7635	0.757	0.76025	0.00459619	0.931	0.859	0.895	0.0509117		1.338	1.31	1.324	0.019799	0.334	0.388	0.361	0.0381838	0.241	0.132	0.1865	0.0770746	0.13	0.3	0.215	0.120208
14.5	1.31	1.199	1.2545	0.0784889	0.804	0.799	0.8015	0.00353553	0.7465	0.75	0.74825	0.00247487	0.901	0.852	0.8765	0.0346482		1.345	1.32	1.3325	0.0176777	0.347	0.407	0.377	0.0424264	0.313	0.143	0.228	0.120208	0.149	0.317	0.233	0.118794
14.75	1.308	1.197	1.2525	0.0784889	0.7905	0.7895	0.79	0.000707107	0.7305	0.725	0.72775	0.00388909	0.882	0.827	0.8545	0.0388909		1.347	1.326	1.3365	0.0148492	0.359	0.419	0.389	0.0424264	0.307	0.153	0.23	0.108894	0.162	0.334	0.248	0.121622
15	1.31	1.205	1.2575	0.0742462	0.7775	0.775	0.77625	0.00176777	0.75	0.734	0.742	0.0113137	0.859	0.823	0.841	0.0254558		1.349	1.336	1.3425	0.00919239	0.366	0.429	0.3975	0.0445477	0.25	0.167	0.2085	0.0586899	0.186	0.355	0.2705	0.119501
15.25	1.312	1.211	1.2615	0.0714178	0.765	0.761	0.763	0.00282843	0.7175	0.695	0.70625	0.0159099	0.846	0.812	0.829	0.0240416		1.353	1.344	1.3485	0.00636396	0.366	0.437	0.4015	0.0502046	0.31	0.188	0.249	0.086267	0.215	0.377	0.296	0.114551
15.5	1.312	1.213	1.2625	0.0700036	0.7535	0.75	0.75175	0.00247487	0.709	0.678	0.6935	0.0219203	0.819	0.792	0.8055	0.0190919		1.354	1.349	1.3515	0.00353553	0.367	0.449	0.408	0.0579828	0.332	0.208	0.27	0.0876812	0.255	0.398	0.3265	0.101116
15.75	1.314	1.221	1.2675	0.0657609	0.745	0.7375	0.74125	0.0053033	0.67	0.672	0.671	0.00141421	0.807	0.785	0.796	0.0155563		1.359	1.356	1.3575	0.00212132	0.365	0.459	0.412	0.066468	0.279	0.234	0.2565	0.0318198	0.293	0.423	0.358	0.0919239
16	1.312	1.225	1.2685	0.0615183	0.7335	0.727	0.73025	0.00459619	0.706	0.662	0.684	0.0311127	0.786	0.769	0.7775	0.0120208		1.359	1.358	1.3585	0.000707107	0.36	0.472	0.416	0.079196	0.296	0.253	0.2745	0.0304056	0.279	0.447	0.363	0.118794
16.25	1.31	1.227	1.2685	0.0586899	0.72	0.7125	0.71625	0.0053033	0.6495	0.649	0.64925	0.000353553	0.765	0.752	0.7585	0.00919239		1.359	1.36	1.3595	0.000707107	0.368	0.493	0.4305	0.0883883	0.314	0.271	0.2925	0.0304056	0.351	0.47	0.4105	0.0841457
16.5	1.304	1.227	1.2655	0.0544472	0.711	0.7005	0.70575	0.00742462	0.6425	0.647	0.64475	0.00318198	0.742	0.747	0.7445	0.00353553		1.356	1.362	1.359	0.00424264	0.371	0.511	0.441	0.0989949	0.323	0.282	0.3025	0.0289914	0.35	0.497	0.4235	0.103945
16.75	1.3	1.233	1.2665	0.0473762	0.704	0.712	0.708	0.00565685	0.626	0.692	0.659	0.046669	0.725	0.73	0.7275	0.00353553		1.356	1.363	1.3595	0.00494975	0.374	0.529	0.4515	0.109602	0.336	0.288	0.312	0.0339411	0.376	0.525	0.4505	0.105359
17	1.3	1.237	1.2685	0.0445477	0.691	0.6805	0.68575	0.00742462	0.6055	0.628	0.61675	0.0159099	0.72	0.722	0.721	0.00141421		1.36	1.366	1.363	0.00424264	0.386	0.549	0.4675	0.115258	0.35	0.287	0.3185	0.0445477	0.401	0.547	0.474	0.103238
17.25	1.292	1.233	1.2625	0.0417193	0.684	0.6925	0.68825	0.00601041	0.6895	0.622	0.65575	0.0477297	0.698	0.71	0.704	0.00848528		1.355	1.366	1.3605	0.00777817	0.395	0.573	0.484	0.125865	0.351	0.277	0.314	0.0523259	0.424	0.572	0.498	0.104652
17.5	1.288	1.239	1.2635	0.0346482	0.6775	0.6615	0.6695	0.0113137	0.5875	0.638	0.61275	0.0357089	0.69	0.708	0.699	0.0127279		1.361	1.369	1.365	0.00565685	0.41	0.596	0.503	0.131522	0.365	0.263	0.314	0.0721249	0.449	0.597	0.523	0.104652
17.75	1.282	1.24	1.261	0.0296985	0.666	0.652	0.659	0.00989949	0.618	0.595	0.6065	0.0162635	0.671	0.692	0.6815	0.0148492		1.359	1.367	1.363	0.00565685	0.434	0.613	0.5235	0.126572	0.368	0.245	0.3065	0.0869741	0.469	0.617	0.543	0.104652
18	1.278	1.241	1.2595	0.026163	0.656	0.6525	0.65425	0.00247487	0.58	0.595	0.5875	0.0106066	0.665	0.689	0.677	0.0169706		1.36	1.366	1.363	0.00424264	0.455	0.64	0.5475	0.130815	0.384	0.231	0.3075	0.108187	0.492	0.64	0.566	0.104652
18.25	1.27	1.241	1.2555	0.0205061	0.6505	0.6355	0.643	0.0106066	0.5965	0.627	0.61175	0.0215668	0.653	0.686	0.6695	0.0233345		1.359	1.368	1.3635	0.00636396	0.474	0.659	0.5665	0.130815	0.399	0.219	0.309	0.127279	0.512	0.663	0.5875	0.106773
18.5	1.26	1.24	1.25	0.0141421	0.6675	0.631	0.64925	0.0258094	0.595	0.598	0.5965	0.00212132	0.631	0.683	0.657	0.0367696		1.356	1.366	1.361	0.00707107	0.5	0.67	0.585	0.120208	0.41	0.21	0.31	0.141421	0.518	0.684	0.601	0.11738
18.75	1.247	1.235	1.241	0.00848528	0.637	0.6225	0.62975	0.010253	0.557	0.604	0.5805	0.033234	0.623	0.669	0.646	0.0325269		1.35	1.363	1.3565	0.00919239	0.523	0.695	0.609	0.121622	0.423	0.2	0.3115	0.157685	0.53	0.702	0.616	0.121622
19	1.247	1.239	1.243	0.00565685	0.65	0.6165	0.63325	0.0236881	0.5515	0.591	0.57125	0.0279307	0.625	0.679	0.652	0.0381838		1.357	1.366	1.3615	0.00636396	0.546	0.713	0.6295	0.118087	0.453	0.199	0.326	0.179605	0.555	0.729	0.642	0.123037
19.25	1.231	1.235	1.233	0.00282843	0.625	0.6155	0.62025	0.00671751	0.567	0.565	0.566	0.00141421	0.603	0.667	0.635	0.0452548		1.349	1.362	1.3555	0.00919239	0.567	0.729	0.648	0.114551	0.47	0.199	0.3345	0.191626	0.555	0.745	0.65	0.13435
19.5	1.219	1.233	1.226	0.00989949	0.6285	0.595	0.61175	0.0236881	0.573	0.562	0.5675	0.00777817	0.598	0.667	0.6325	0.0487904		1.345	1.363	1.354	0.0127279	0.593	0.749	0.671	0.110309	0.496	0.198	0.347	0.210718	0.57	0.772	0.671	0.142836
19.75	1.219	1.225	1.222	0.00424264	0.6185	0.59	0.60425	0.0201525	0.595	0.559	0.577	0.0254558	0.596	0.662	0.629	0.046669		1.35	1.357	1.3535	0.00494975	0.611	0.766	0.6885	0.109602	0.517	0.194	0.3555	0.228395	0.591	0.791	0.691	0.141421
20	1.203	1.233	1.218	0.0212132	0.6005	0.5805	0.5905	0.0141421	0.5515	0.555	0.55325	0.00247487	0.586	0.664	0.625	0.0551543		1.343	1.362	1.3525	0.013435	0.633	0.782	0.7075	0.105359	0.54	0.192	0.366	0.246073	0.604	0.805	0.7045	0.142128

## Sheet: 2A-Additional Data
Time	0 µg/mL Moenomycin																	Time	0.4 µg/mL Moenomycin
(hours)	WT_BR 3	WT_BR 4	AVG	SD	ΔecsA_BR 3	ΔecsA_BR 4	AVG	SD	ΔrasP_BR 3	ΔrasP_BR 4	AVG	SD	ΔecsAΔrasP_BR 3	ΔecsAΔrasP_BR 4	AVG	SD		(hours)	WT_BR 3	WT_BR 4	AVG	SD	ΔecsA_BR 3	ΔecsA_BR 4	AVG	SD	ΔrasP_BR 3	ΔrasP_BR 4	AVG	SD	ΔecsAΔrasP_BR 3	ΔecsAΔrasP_BR 4	AVG	SD
0	0.01	0.01	0.01	0	0.01	0.011	0.0105	0.000707107	0.009	0.011	0.01	0.00141421	0.008	0.012	0.01	0.00282843		0	0.01	0.011	0.0105	0.000707107	0.01	0.013	0.0115	0.00212132	0.018	0.013	0.0155	0.00353553	0.008	0.018	0.013	0.00707107
0.25	0.012	0.012	0.012	0	0.013	0.012	0.0125	0.000707107	0.012	0.012	0.012	0	0.011	0.012	0.0115	0.000707107		0.25	0.011	0.012	0.0115	0.000707107	0.012	0.013	0.0125	0.000707107	0.021	0.011	0.016	0.00707107	0.012	0.012	0.012	0
0.5	0.012	0.012	0.012	0	0.013	0.013	0.013	0	0.012	0.012	0.012	0	0.012	0.013	0.0125	0.000707107		0.5	0.01	0.013	0.0115	0.00212132	0.012	0.013	0.0125	0.000707107	0.021	0.013	0.017	0.00565685	0.012	0.012	0.012	0
0.75	0.01	0.011	0.0105	0.000707107	0.011	0.011	0.011	0	0.011	0.011	0.011	0	0.012	0.011	0.0115	0.000707107		0.75	0.011	0.01	0.0105	0.000707107	0.011	0.01	0.0105	0.000707107	0.02	0.011	0.0155	0.00636396	0.01	0.012	0.011	0.00141421
1	0.013	0.012	0.0125	0.000707107	0.012	0.012	0.012	0	0.012	0.011	0.0115	0.000707107	0.013	0.012	0.0125	0.000707107		1	0.011	0.012	0.0115	0.000707107	0.012	0.013	0.0125	0.000707107	0.021	0.012	0.0165	0.00636396	0.012	0.013	0.0125	0.000707107
1.25	0.012	0.011	0.0115	0.000707107	0.012	0.011	0.0115	0.000707107	0.011	0.011	0.011	0	0.011	0.011	0.011	0		1.25	0.012	0.012	0.012	0	0.011	0.011	0.011	0	0.02	0.012	0.016	0.00565685	0.012	0.011	0.0115	0.000707107
1.5	0.095	0.058	0.0765	0.026163	0.091	0.067	0.079	0.0169706	0.083	0.06	0.0715	0.0162635	0.086	0.075	0.0805	0.00777817		1.5	0.065	0.058	0.0615	0.00494975	0.056	0.06	0.058	0.00282843	0.075	0.053	0.064	0.0155563	0.077	0.065	0.071	0.00848528
1.75	0.108	0.066	0.087	0.0296985	0.107	0.075	0.091	0.0226274	0.096	0.065	0.0805	0.0219203	0.101	0.082	0.0915	0.013435		1.75	0.076	0.063	0.0695	0.00919239	0.069	0.068	0.0685	0.000707107	0.082	0.06	0.071	0.0155563	0.086	0.071	0.0785	0.0106066
2	0.114	0.07	0.092	0.0311127	0.112	0.081	0.0965	0.0219203	0.101	0.068	0.0845	0.0233345	0.1	0.084	0.092	0.0113137		2	0.08	0.065	0.0725	0.0106066	0.073	0.07	0.0715	0.00212132	0.084	0.061	0.0725	0.0162635	0.086	0.073	0.0795	0.00919239
2.25	0.123	0.075	0.099	0.0339411	0.116	0.089	0.1025	0.0190919	0.113	0.074	0.0935	0.0275772	0.102	0.089	0.0955	0.00919239		2.25	0.084	0.068	0.076	0.0113137	0.074	0.073	0.0735	0.000707107	0.087	0.064	0.0755	0.0162635	0.088	0.077	0.0825	0.00777817
2.5	0.125	0.076	0.1005	0.0346482	0.117	0.092	0.1045	0.0176777	0.12	0.078	0.099	0.0296985	0.106	0.093	0.0995	0.00919239		2.5	0.083	0.066	0.0745	0.0120208	0.072	0.07	0.071	0.00141421	0.086	0.062	0.074	0.0169706	0.088	0.076	0.082	0.00848528
2.75	0.146	0.091	0.1185	0.0388909	0.134	0.111	0.1225	0.0162635	0.138	0.093	0.1155	0.0318198	0.117	0.103	0.11	0.00989949		2.75	0.093	0.075	0.084	0.0127279	0.079	0.076	0.0775	0.00212132	0.09	0.066	0.078	0.0169706	0.089	0.078	0.0835	0.00777817
3	0.164	0.108	0.136	0.039598	0.162	0.134	0.148	0.019799	0.163	0.114	0.1385	0.0346482	0.133	0.115	0.124	0.0127279		3	0.102	0.081	0.0915	0.0148492	0.084	0.079	0.0815	0.00353553	0.091	0.067	0.079	0.0169706	0.089	0.079	0.084	0.00707107
3.25	0.201	0.138	0.1695	0.0445477	0.204	0.176	0.19	0.019799	0.21	0.153	0.1815	0.0403051	0.161	0.135	0.148	0.0183848		3.25	0.114	0.089	0.1015	0.0176777	0.084	0.08	0.082	0.00282843	0.094	0.069	0.0815	0.0176777	0.09	0.081	0.0855	0.00636396
3.5	0.249	0.181	0.215	0.0480833	0.265	0.23	0.2475	0.0247487	0.268	0.212	0.24	0.039598	0.198	0.161	0.1795	0.026163		3.5	0.12	0.093	0.1065	0.0190919	0.08	0.076	0.078	0.00282843	0.091	0.065	0.078	0.0183848	0.086	0.077	0.0815	0.00636396
3.75	0.324	0.25	0.287	0.0523259	0.344	0.31	0.327	0.0240416	0.352	0.303	0.3275	0.0346482	0.265	0.205	0.235	0.0424264		3.75	0.139	0.106	0.1225	0.0233345	0.082	0.076	0.079	0.00424264	0.093	0.068	0.0805	0.0176777	0.085	0.076	0.0805	0.00636396
4	0.416	0.343	0.3795	0.0516188	0.439	0.406	0.4225	0.0233345	0.44	0.406	0.423	0.0240416	0.351	0.269	0.31	0.0579828		4	0.167	0.131	0.149	0.0254558	0.083	0.078	0.0805	0.00353553	0.094	0.069	0.0815	0.0176777	0.092	0.079	0.0855	0.00919239
4.25	0.486	0.409	0.4475	0.0544472	0.509	0.471	0.49	0.0268701	0.501	0.463	0.482	0.0268701	0.436	0.357	0.3965	0.0558614		4.25	0.194	0.158	0.176	0.0254558	0.084	0.078	0.081	0.00424264	0.093	0.067	0.08	0.0183848	0.095	0.08	0.0875	0.0106066
4.5	0.528	0.457	0.4925	0.0502046	0.558	0.511	0.5345	0.033234	0.55	0.51	0.53	0.0282843	0.499	0.421	0.46	0.0551543		4.5	0.226	0.194	0.21	0.0226274	0.085	0.079	0.082	0.00424264	0.091	0.068	0.0795	0.0162635	0.087	0.077	0.082	0.00707107
4.75	0.577	0.491	0.534	0.0608112	0.61	0.556	0.583	0.0381838	0.608	0.561	0.5845	0.033234	0.555	0.486	0.5205	0.0487904		4.75	0.26	0.228	0.244	0.0226274	0.085	0.08	0.0825	0.00353553	0.094	0.069	0.0815	0.0176777	0.09	0.08	0.085	0.00707107
5	0.626	0.523	0.5745	0.072832	0.654	0.58	0.617	0.0523259	0.643	0.592	0.6175	0.0360624	0.604	0.534	0.569	0.0494975		5	0.297	0.266	0.2815	0.0219203	0.078	0.07	0.074	0.00565685	0.086	0.061	0.0735	0.0176777	0.085	0.072	0.0785	0.00919239
5.25	0.676	0.56	0.618	0.0820244	0.71	0.627	0.6685	0.0586899	0.7	0.641	0.6705	0.0417193	0.655	0.572	0.6135	0.0586899		5.25	0.307	0.297	0.302	0.00707107	0.084	0.076	0.08	0.00565685	0.09	0.065	0.0775	0.0176777	0.087	0.077	0.082	0.00707107
5.5	0.712	0.594	0.653	0.0834386	0.74	0.657	0.6985	0.0586899	0.74	0.688	0.714	0.0367696	0.709	0.612	0.6605	0.0685894		5.5	0.315	0.321	0.318	0.00424264	0.081	0.078	0.0795	0.00212132	0.091	0.066	0.0785	0.0176777	0.09	0.08	0.085	0.00707107
5.75	0.747	0.627	0.687	0.0848528	0.772	0.681	0.7265	0.0643467	0.773	0.722	0.7475	0.0360624	0.752	0.649	0.7005	0.072832		5.75	0.319	0.335	0.327	0.0113137	0.086	0.08	0.083	0.00424264	0.092	0.067	0.0795	0.0176777	0.092	0.08	0.086	0.00848528
6	0.781	0.658	0.7195	0.0869741	0.798	0.701	0.7495	0.0685894	0.804	0.754	0.779	0.0353553	0.784	0.683	0.7335	0.0714178		6	0.32	0.35	0.335	0.0212132	0.086	0.083	0.0845	0.00212132	0.094	0.07	0.082	0.0169706	0.091	0.081	0.086	0.00707107
6.25	0.808	0.682	0.745	0.0890955	0.817	0.714	0.7655	0.072832	0.826	0.776	0.801	0.0353553	0.812	0.717	0.7645	0.0671751		6.25	0.311	0.358	0.3345	0.033234	0.085	0.082	0.0835	0.00212132	0.091	0.066	0.0785	0.0176777	0.091	0.08	0.0855	0.00777817
6.5	0.836	0.706	0.771	0.0919239	0.836	0.727	0.7815	0.0770746	0.85	0.799	0.8245	0.0360624	0.838	0.749	0.7935	0.0629325		6.5	0.305	0.36	0.3325	0.0388909	0.084	0.08	0.082	0.00282843	0.092	0.068	0.08	0.0169706	0.093	0.083	0.088	0.00707107
6.75	0.861	0.729	0.795	0.0933381	0.856	0.741	0.7985	0.0813173	0.873	0.819	0.846	0.0381838	0.86	0.775	0.8175	0.0601041		6.75	0.309	0.372	0.3405	0.0445477	0.087	0.083	0.085	0.00282843	0.095	0.069	0.082	0.0183848	0.094	0.081	0.0875	0.00919239
7	0.885	0.751	0.818	0.0947523	0.87	0.747	0.8085	0.0869741	0.88	0.838	0.859	0.0296985	0.882	0.798	0.84	0.059397		7	0.316	0.387	0.3515	0.0502046	0.087	0.081	0.084	0.00424264	0.095	0.069	0.082	0.0183848	0.092	0.084	0.088	0.00565685
7.25	0.891	0.767	0.829	0.0876812	0.866	0.751	0.8085	0.0813173	0.882	0.846	0.864	0.0254558	0.891	0.809	0.85	0.0579828		7.25	0.325	0.404	0.3645	0.0558614	0.082	0.078	0.08	0.00282843	0.092	0.065	0.0785	0.0190919	0.087	0.072	0.0795	0.0106066
7.5	0.907	0.788	0.8475	0.0841457	0.882	0.761	0.8215	0.0855599	0.907	0.858	0.8825	0.0346482	0.906	0.832	0.869	0.0523259		7.5	0.343	0.434	0.3885	0.0643467	0.081	0.076	0.0785	0.00353553	0.09	0.064	0.077	0.0183848	0.087	0.076	0.0815	0.00777817
7.75	0.938	0.815	0.8765	0.0869741	0.913	0.771	0.842	0.100409	0.931	0.857	0.894	0.0523259	0.926	0.856	0.891	0.0494975		7.75	0.377	0.472	0.4245	0.0671751	0.083	0.083	0.083	0	0.095	0.068	0.0815	0.0190919	0.092	0.081	0.0865	0.00777817
8	0.964	0.834	0.899	0.0919239	0.936	0.77	0.853	0.11738	0.953	0.861	0.907	0.0650538	0.95	0.87	0.91	0.0565685		8	0.407	0.504	0.4555	0.0685894	0.087	0.083	0.085	0.00282843	0.094	0.067	0.0805	0.0190919	0.092	0.081	0.0865	0.00777817
8.25	0.985	0.85	0.9175	0.0954594	0.954	0.77	0.862	0.130108	0.969	0.878	0.9235	0.0643467	0.971	0.874	0.9225	0.0685894		8.25	0.435	0.533	0.484	0.0692965	0.084	0.082	0.083	0.00141421	0.093	0.067	0.08	0.0183848	0.096	0.082	0.089	0.00989949
8.5	1.011	0.861	0.936	0.106066	0.974	0.779	0.8765	0.137886	0.981	0.898	0.9395	0.0586899	0.99	0.87	0.93	0.0848528		8.5	0.475	0.568	0.5215	0.0657609	0.088	0.089	0.0885	0.000707107	0.095	0.069	0.082	0.0183848	0.096	0.084	0.09	0.00848528
8.75	1.014	0.866	0.94	0.104652	0.978	0.771	0.8745	0.146371	0.989	0.902	0.9455	0.0615183	0.996	0.873	0.9345	0.0869741		8.75	0.498	0.591	0.5445	0.0657609	0.086	0.081	0.0835	0.00353553	0.092	0.064	0.078	0.019799	0.089	0.074	0.0815	0.0106066
9	1.026	0.89	0.958	0.0961665	0.99	0.772	0.881	0.154149	0.997	0.912	0.9545	0.0601041	1.01	0.893	0.9515	0.0827315		9	0.529	0.622	0.5755	0.0657609	0.09	0.08	0.085	0.00707107	0.09	0.064	0.077	0.0183848	0.088	0.073	0.0805	0.0106066
9.25	1.038	0.911	0.9745	0.0898026	0.995	0.764	0.8795	0.163342	1.002	0.918	0.96	0.059397	1.02	0.913	0.9665	0.0756604		9.25	0.558	0.648	0.603	0.0636396	0.084	0.081	0.0825	0.00212132	0.089	0.064	0.0765	0.0176777	0.088	0.074	0.081	0.00989949
9.5	1.048	0.928	0.988	0.0848528	0.995	0.759	0.877	0.166877	1.004	0.922	0.963	0.0579828	1.026	0.926	0.976	0.0707107		9.5	0.582	0.67	0.626	0.0622254	0.084	0.091	0.0875	0.00494975	0.088	0.061	0.0745	0.0190919	0.084	0.07	0.077	0.00989949
9.75	1.07	0.951	1.0105	0.0841457	1.008	0.764	0.886	0.172534	1.01	0.93	0.97	0.0565685	1.036	0.942	0.989	0.066468		9.75	0.614	0.704	0.659	0.0636396	0.091	0.096	0.0935	0.00353553	0.09	0.064	0.077	0.0183848	0.089	0.075	0.082	0.00989949
10	1.08	0.964	1.022	0.0820244	1.01	0.757	0.8835	0.178898	1.01	0.931	0.9705	0.0558614	1.038	0.953	0.9955	0.0601041		10	0.637	0.727	0.682	0.0636396	0.093	0.107	0.1	0.00989949	0.088	0.062	0.075	0.0183848	0.088	0.072	0.08	0.0113137
10.25	1.096	0.975	1.0355	0.0855599	1.016	0.756	0.886	0.183848	1.01	0.931	0.9705	0.0558614	1.034	0.964	0.999	0.0494975		10.25	0.665	0.753	0.709	0.0622254	0.095	0.106	0.1005	0.00777817	0.089	0.064	0.0765	0.0176777	0.087	0.072	0.0795	0.0106066
10.5	1.108	0.985	1.0465	0.0869741	1.018	0.747	0.8825	0.191626	1.007	0.922	0.9645	0.0601041	1.032	0.971	1.0015	0.0431335		10.5	0.689	0.774	0.7315	0.0601041	0.103	0.12	0.1115	0.0120208	0.087	0.061	0.074	0.0183848	0.086	0.069	0.0775	0.0120208
10.75	1.122	1	1.061	0.086267	1.026	0.745	0.8855	0.198697	1.008	0.917	0.9625	0.0643467	1.038	0.979	1.0085	0.0417193		10.75	0.717	0.799	0.758	0.0579828	0.102	0.129	0.1155	0.0190919	0.087	0.062	0.0745	0.0176777	0.088	0.073	0.0805	0.0106066
11	1.135	1.014	1.0745	0.0855599	1.034	0.737	0.8855	0.210011	1.01	0.92	0.965	0.0636396	1.042	0.984	1.013	0.0410122		11	0.742	0.823	0.7825	0.0572756	0.115	0.152	0.1335	0.026163	0.094	0.068	0.081	0.0183848	0.097	0.084	0.0905	0.00919239
11.25	1.149	1.026	1.0875	0.0869741	1.036	0.729	0.8825	0.217082	1.01	0.91	0.96	0.0707107	1.042	0.984	1.013	0.0410122		11.25	0.766	0.848	0.807	0.0579828	0.118	0.157	0.1375	0.0275772	0.094	0.067	0.0805	0.0190919	0.097	0.085	0.091	0.00848528
11.5	1.153	1.03	1.0915	0.0869741	1.028	0.707	0.8675	0.226981	1	0.894	0.947	0.0749533	1.034	0.97	1.002	0.0452548		11.5	0.781	0.865	0.823	0.059397	0.122	0.159	0.1405	0.026163	0.089	0.063	0.076	0.0183848	0.088	0.073	0.0805	0.0106066
11.75	1.161	1.038	1.0995	0.0869741	1.026	0.696	0.861	0.233345	0.997	0.893	0.945	0.0735391	1.032	0.97	1.001	0.0438406		11.75	0.803	0.889	0.846	0.0608112	0.122	0.181	0.1515	0.0417193	0.09	0.064	0.077	0.0183848	0.087	0.073	0.08	0.00989949
12	1.171	1.048	1.1095	0.0869741	1.024	0.682	0.853	0.241831	0.991	0.883	0.937	0.0763675	1.024	0.969	0.9965	0.0388909		12	0.823	0.911	0.867	0.0622254	0.129	0.184	0.1565	0.0388909	0.089	0.062	0.0755	0.0190919	0.087	0.073	0.08	0.00989949
12.25	1.173	1.062	1.1175	0.0784889	1.012	0.678	0.845	0.236174	0.983	0.886	0.9345	0.0685894	1.018	0.967	0.9925	0.0360624		12.25	0.843	0.933	0.888	0.0636396	0.136	0.193	0.1645	0.0403051	0.091	0.064	0.0775	0.0190919	0.087	0.074	0.0805	0.00919239
12.5	1.181	1.066	1.1235	0.0813173	1.006	0.668	0.837	0.239002	0.971	0.868	0.9195	0.072832	1.004	0.968	0.986	0.0254558		12.5	0.866	0.955	0.9105	0.0629325	0.139	0.191	0.165	0.0367696	0.09	0.064	0.077	0.0183848	0.089	0.074	0.0815	0.0106066
12.75	1.185	1.076	1.1305	0.0770746	0.995	0.661	0.828	0.236174	0.959	0.875	0.917	0.059397	0.994	0.968	0.981	0.0183848		12.75	0.886	0.977	0.9315	0.0643467	0.145	0.194	0.1695	0.0346482	0.091	0.064	0.0775	0.0190919	0.089	0.076	0.0825	0.00919239
13	1.191	1.082	1.1365	0.0770746	0.989	0.652	0.8205	0.238295	0.945	0.856	0.9005	0.0629325	0.979	0.968	0.9735	0.00777817		13	0.907	1	0.9535	0.0657609	0.151	0.196	0.1735	0.0318198	0.092	0.064	0.078	0.019799	0.09	0.076	0.083	0.00989949
13.25	1.199	1.088	1.1435	0.0784889	0.979	0.642	0.8105	0.238295	0.931	0.85	0.8905	0.0572756	0.967	0.966	0.9665	0.000707107		13.25	0.928	1.02	0.974	0.0650538	0.158	0.195	0.1765	0.026163	0.091	0.062	0.0765	0.0205061	0.09	0.076	0.083	0.00989949
13.5	1.203	1.096	1.1495	0.0756604	0.979	0.638	0.8085	0.241123	0.915	0.838	0.8765	0.0544472	0.954	0.964	0.959	0.00707107		13.5	0.946	1.042	0.994	0.0678823	0.159	0.188	0.1735	0.0205061	0.092	0.066	0.079	0.0183848	0.087	0.074	0.0805	0.00919239
13.75	1.207	1.102	1.1545	0.0742462	0.976	0.627	0.8015	0.24678	0.897	0.811	0.854	0.0608112	0.947	0.965	0.956	0.0127279		13.75	0.966	1.062	1.014	0.0678823	0.157	0.18	0.1685	0.0162635	0.091	0.065	0.078	0.0183848	0.092	0.08	0.086	0.00848528
14	1.218	1.111	1.1645	0.0756604	0.976	0.626	0.801	0.247487	0.887	0.81	0.8485	0.0544472	0.94	0.969	0.9545	0.0205061		14	0.995	1.087	1.041	0.0650538	0.16	0.182	0.171	0.0155563	0.098	0.072	0.085	0.0183848	0.096	0.089	0.0925	0.00494975
14.25	1.221	1.114	1.1675	0.0756604	0.97	0.62	0.795	0.247487	0.867	0.804	0.8355	0.0445477	0.926	0.966	0.946	0.0282843		14.25	1.008	1.104	1.056	0.0678823	0.155	0.172	0.1635	0.0120208	0.095	0.071	0.083	0.0169706	0.095	0.09	0.0925	0.00353553
14.5	1.221	1.112	1.1665	0.0770746	0.96	0.601	0.7805	0.253851	0.847	0.775	0.811	0.0509117	0.906	0.959	0.9325	0.0374767		14.5	1.018	1.114	1.066	0.0678823	0.146	0.163	0.1545	0.0120208	0.095	0.068	0.0815	0.0190919	0.091	0.083	0.087	0.00565685
14.75	1.229	1.117	1.173	0.079196	0.955	0.592	0.7735	0.25668	0.827	0.764	0.7955	0.0445477	0.896	0.959	0.9275	0.0445477		14.75	1.038	1.129	1.0835	0.0643467	0.146	0.163	0.1545	0.0120208	0.094	0.07	0.082	0.0169706	0.093	0.088	0.0905	0.00353553
15	1.235	1.122	1.1785	0.0799031	0.949	0.581	0.765	0.260215	0.81	0.76	0.785	0.0353553	0.884	0.96	0.922	0.0537401		15	1.054	1.137	1.0955	0.0586899	0.142	0.16	0.151	0.0127279	0.095	0.071	0.083	0.0169706	0.094	0.091	0.0925	0.00212132
15.25	1.237	1.127	1.182	0.0777817	0.948	0.572	0.76	0.265872	0.789	0.739	0.764	0.0353553	0.872	0.958	0.915	0.0608112		15.25	1.068	1.147	1.1075	0.0558614	0.14	0.163	0.1515	0.0162635	0.095	0.072	0.0835	0.0162635	0.093	0.092	0.0925	0.000707107
15.5	1.241	1.135	1.188	0.0749533	0.948	0.567	0.7575	0.269408	0.778	0.731	0.7545	0.033234	0.866	0.964	0.915	0.0692965		15.5	1.084	1.163	1.1235	0.0558614	0.139	0.172	0.1555	0.0233345	0.1	0.078	0.089	0.0155563	0.1	0.104	0.102	0.00282843
15.75	1.24	1.137	1.1885	0.072832	0.941	0.555	0.748	0.272943	0.758	0.703	0.7305	0.0388909	0.851	0.954	0.9025	0.072832		15.75	1.092	1.167	1.1295	0.053033	0.138	0.173	0.1555	0.0247487	0.102	0.079	0.0905	0.0162635	0.097	0.105	0.101	0.00565685
16	1.246	1.151	1.1985	0.0671751	0.944	0.556	0.75	0.274357	0.748	0.695	0.7215	0.0374767	0.845	0.962	0.9035	0.0827315		16	1.11	1.185	1.1475	0.053033	0.14	0.187	0.1635	0.033234	0.108	0.088	0.098	0.0141421	0.106	0.115	0.1105	0.00636396
16.25	1.243	1.147	1.195	0.0678823	0.933	0.536	0.7345	0.280721	0.722	0.681	0.7015	0.0289914	0.824	0.952	0.888	0.0905097		16.25	1.114	1.185	1.1495	0.0502046	0.134	0.186	0.16	0.0367696	0.105	0.088	0.0965	0.0120208	0.099	0.12	0.1095	0.0148492
16.5	1.247	1.159	1.203	0.0622254	0.939	0.534	0.7365	0.286378	0.713	0.675	0.694	0.0268701	0.824	0.96	0.892	0.0961665		16.5	1.131	1.203	1.167	0.0509117	0.137	0.201	0.169	0.0452548	0.114	0.101	0.1075	0.00919239	0.109	0.135	0.122	0.0183848
16.75	1.241	1.155	1.198	0.0608112	0.926	0.517	0.7215	0.289207	0.694	0.668	0.681	0.0183848	0.806	0.955	0.8805	0.105359		16.75	1.135	1.205	1.17	0.0494975	0.133	0.202	0.1675	0.0487904	0.113	0.104	0.1085	0.00636396	0.107	0.134	0.1205	0.0190919
17	1.244	1.157	1.2005	0.0615183	0.917	0.505	0.711	0.291328	0.678	0.649	0.6635	0.0205061	0.791	0.955	0.873	0.115966		17	1.145	1.217	1.181	0.0509117	0.134	0.209	0.1715	0.053033	0.112	0.111	0.1115	0.000707107	0.11	0.146	0.128	0.0254558
17.25	1.241	1.159	1.2	0.0579828	0.92	0.497	0.7085	0.299106	0.665	0.632	0.6485	0.0233345	0.778	0.958	0.868	0.127279		17.25	1.155	1.225	1.19	0.0494975	0.135	0.221	0.178	0.0608112	0.117	0.124	0.1205	0.00494975	0.113	0.162	0.1375	0.0346482
17.5	1.241	1.159	1.2	0.0579828	0.913	0.484	0.6985	0.303349	0.646	0.62	0.633	0.0183848	0.765	0.958	0.8615	0.136472		17.5	1.159	1.231	1.195	0.0509117	0.132	0.23	0.181	0.0692965	0.118	0.137	0.1275	0.013435	0.116	0.179	0.1475	0.0445477
17.75	1.235	1.159	1.197	0.0537401	0.908	0.474	0.691	0.306884	0.635	0.616	0.6255	0.013435	0.75	0.96	0.855	0.148492		17.75	1.169	1.238	1.2035	0.0487904	0.135	0.243	0.189	0.0763675	0.123	0.15	0.1365	0.0190919	0.121	0.196	0.1585	0.053033
18	1.234	1.157	1.1955	0.0544472	0.902	0.467	0.6845	0.307591	0.623	0.6	0.6115	0.0162635	0.736	0.962	0.849	0.159806		18	1.173	1.244	1.2085	0.0502046	0.136	0.257	0.1965	0.0855599	0.127	0.166	0.1465	0.0275772	0.125	0.213	0.169	0.0622254
18.25	1.229	1.159	1.194	0.0494975	0.899	0.458	0.6785	0.311834	0.611	0.593	0.602	0.0127279	0.723	0.965	0.844	0.17112		18.25	1.179	1.25	1.2145	0.0502046	0.139	0.273	0.206	0.0947523	0.131	0.185	0.158	0.0381838	0.136	0.229	0.1825	0.0657609
18.5	1.229	1.157	1.193	0.0509117	0.895	0.452	0.6735	0.313248	0.601	0.588	0.5945	0.00919239	0.71	0.969	0.8395	0.183141		18.5	1.185	1.26	1.2225	0.053033	0.145	0.294	0.2195	0.105359	0.141	0.204	0.1725	0.0445477	0.145	0.255	0.2	0.0777817
18.75	1.221	1.155	1.188	0.046669	0.885	0.442	0.6635	0.313248	0.588	0.569	0.5785	0.013435	0.693	0.965	0.829	0.192333		18.75	1.189	1.26	1.2245	0.0502046	0.145	0.316	0.2305	0.120915	0.142	0.212	0.177	0.0494975	0.15	0.266	0.208	0.0820244
19	1.221	1.157	1.189	0.0452548	0.883	0.435	0.659	0.316784	0.581	0.569	0.575	0.00848528	0.681	0.97	0.8255	0.204354		19	1.197	1.27	1.2335	0.0516188	0.152	0.338	0.245	0.131522	0.152	0.224	0.188	0.0509117	0.162	0.277	0.2195	0.0813173
19.25	1.217	1.155	1.186	0.0438406	0.871	0.428	0.6495	0.313248	0.572	0.563	0.5675	0.00636396	0.666	0.97	0.818	0.21496		19.25	1.199	1.272	1.2355	0.0516188	0.156	0.363	0.2595	0.146371	0.158	0.223	0.1905	0.0459619	0.174	0.288	0.231	0.0806102
19.5	1.213	1.155	1.184	0.0410122	0.858	0.418	0.638	0.311127	0.56	0.552	0.556	0.00565685	0.652	0.968	0.81	0.223446		19.5	1.203	1.278	1.2405	0.053033	0.16	0.388	0.274	0.16122	0.165	0.224	0.1945	0.0417193	0.182	0.301	0.2415	0.0841457
19.75	1.209	1.155	1.182	0.0381838	0.849	0.413	0.631	0.308299	0.554	0.549	0.5515	0.00353553	0.639	0.965	0.802	0.230517		19.75	1.205	1.28	1.2425	0.053033	0.166	0.416	0.291	0.176777	0.17	0.225	0.1975	0.0388909	0.197	0.316	0.2565	0.0841457
20	1.205	1.155	1.18	0.0353553	0.834	0.407	0.6205	0.301935	0.544	0.54	0.542	0.00282843	0.629	0.965	0.797	0.237588		20	1.207	1.284	1.2455	0.0544472	0.172	0.445	0.3085	0.19304	0.177	0.223	0.2	0.0325269	0.21	0.328	0.269	0.0834386

## Sheet: 2B
	Zone of Inhibition
	WT		ΔrasP		ΔponA
	AVG	SD	AVG	SD	AVG	SD
Cefuroxime	15.6786	0.952873	32.6	0.5	10.5	0.58
Oxacillin	25.2857	0.755929	28.25	0.377964	25	0.267261
Ampicillin	20.8	0.83666	23.9375	0.417261	26	0.755929
Penicillin G	20.0833	0.66458	23.3125	0.798995	25.1875	0.75297
Biological Replicate values:
Cefuroxime															AVG	SD
WT	15	15	15	16.5	17	17	17	16	16	16	15	15	14	15	15.6786	0.952873
ΔrasP	32	33	33	32	32	33	33								32.5714	0.534522
ΔponA	10	11	10	11											10.5	0.57735
Oxacillin									AVG	SD
WT	26	25	24	26	25	25	26		25.2857	0.755929
ΔrasP	28	28	29	28	28	28	28.5	28.5	28.25	0.377964
ΔponA	25	25	25	24.5	25	25	25	25.5	25	0.267261
Ampicillin									AVG	SD
WT	20	20	21	21	22				20.8	0.83666
ΔrasP	24	24	24	23	24.5	24	24	24	23.9375	0.417261
ΔponA	27	27	26	26	26	25	25	26	26	0.755929
Penicillin G									AVG	SD
WT	20	20	20	19	21	20.5			20.0833	0.66458
ΔrasP	23	22	23	23	24	23	24	24.5	23.3125	0.798995
ΔponA	26	25	25	24.5	24	25	26	26	25.1875	0.75297

## Sheet: 2B-Statistical Analysis
Cefuroxime
Tukey's multiple comparisons test	Adjusted P Value
WT vs. rasP	<0.0001
WT vs. ponA	<0.0001
rasP vs. ponA	<0.0001
Oxacillin
Tukey's multiple comparisons test	Adjusted P Value
WT vs. rasP	<0.0001
WT vs. ponA	0.5179
rasP vs. ponA	<0.0001
Ampicillin
Tukey's multiple comparisons test	Adjusted P Value
WT vs. rasP	<0.0001
WT vs. ponA	<0.0001
rasP vs. ponA	<0.0001
Penicillin G
Tukey's multiple comparisons test	Adjusted P Value
WT vs. rasP	<0.0001
WT vs. ponA	<0.0001
rasP vs. ponA	0.0002
