# Supplementary material for: A regulatory pathway that selectively up-regulates elongasome function in the absence of class A PBPs
Source: eLife. 2020 Sep 8;9:e57902. doi: 10.7554/eLife.57902 (PMC7478892; doi:10.7554/eLife.57902)
Supplement: Figure 3—source data 1. [file elife-57902-fig3-data1.xlsx]

## Sheet: 3A
	Zone of Inhibition
	AVG	SD
WT	15.6786	0.952873
ΔsigV	18.4	1.25
ΔsigW	22.95	1.21221
Δ25ftsL	15.8	0.5
ΔsigI	26.625	1.19
ΔsigVΔsigWΔ25ftsLΔsigI	33.25	1.5
ΔsigIΔsigW	29.875	1.03078
ΔrasP	32.5714	0.53
Biological Replicate values:															AVG	SD
WT	15	15	15	16.5	17	17	17	16	16	16	15	15	14	15	15.6786	0.952873
ΔsigV	20	18.5	18	17											18.375	1.25
ΔsigW	25	25	23	22	23.5	22	23	22	22	22					22.95	1.21221
Δ25ftsL	15	16	16	16											15.75	0.5
ΔsigI	28	28	26	27	25	25	27	27							26.625	1.18773
ΔsigVΔsigWΔ25ftsLΔsigI	32	32	34	35											33.25	1.5
ΔsigIΔsigW	31	29	30.5	29											29.875	1.03078
ΔrasP	32	33	33	32	32	33	33								32.5714	0.534522

## Sheet: 3A-Statistical Analysis
Tukey's multiple comparisons test	Adjusted P Value
WT vs. sigV	0.001
WT vs. sigW	<0.0001
WT vs. ftsL	>0.9999
WT vs. sigI	<0.0001
WT vs. sigVsigWftsLsigI	<0.0001
WT vs. sigIsigW	<0.0001
WT vs. rasP	<0.0001
sigV vs. sigW	<0.0001
sigV vs. ftsL	0.0195
sigV vs. sigI	<0.0001
sigV vs. sigVsigWftsLsigI	<0.0001
sigV vs. sigIsigW	<0.0001
sigV vs. rasP	<0.0001
sigW vs. ftsL	<0.0001
sigW vs. sigI	<0.0001
sigW vs. sigVsigWftsLsigI	<0.0001
sigW vs. sigIsigW	<0.0001
sigW vs. rasP	<0.0001
ftsL vs. sigI	<0.0001
ftsL vs. sigVsigWftsLsigI	<0.0001
ftsL vs. sigIsigW	<0.0001
ftsL vs. rasP	<0.0001
sigI vs. sigVsigWftsLsigI	<0.0001
sigI vs. sigIsigW	0.0002
sigI vs. rasP	<0.0001
sigVsigWftsLsigI vs. sigIsigW	0.001
sigVsigWftsLsigI vs. rasP	0.9674
sigIsigW vs. rasP	0.0039
