# Supplementary material for: A regulatory pathway that selectively up-regulates elongasome function in the absence of class A PBPs
Source: eLife. 2020 Sep 8;9:e57902. doi: 10.7554/eLife.57902 (PMC7478892; doi:10.7554/eLife.57902)
Supplement: Figure 4—source data 1. [file elife-57902-fig4-data1.xlsx]

## Sheet: 4A
	Zone of inhibition
	AVG	SD
WT	15.6786	0.952873
ΔrasP	32.5714	0.53
ΔsigI	26.625	1.19
ΔmreBH	23	0.894427
ΔlytE	22.21	0.809174
ΔmreBHΔlytE	31.3333	0.516398
Biological Replicate values:															AVG	SD
WT	15	15	15	16.5	17	17	17	16	16	16	15	15	14	15	15.6786	0.952873
ΔrasP	32	33	33	32	32	33	33								32.5714	0.534522
ΔsigI	28	28	26	27	25	25	27	27							26.625	1.18773
ΔmreBH	23	24	24	22	22	23									23	0.894427
ΔlytE	21.5	22	22	22	24	22	22								22.2143	0.809174
ΔmreBHΔlytE	31	32	31	31	31	32									31.3333	0.516398

## Sheet: 4A-Statistical Analysis
Tukey's multiple comparisons test	Adjusted P Value
WT vs. rasP	<0.0001
WT vs. sigI	<0.0001
WT vs. mreBH	<0.0001
WT vs. lytE	<0.0001
WT vs. mreBHlytE	<0.0001
rasP vs. sigI	<0.0001
rasP vs. mreBH	<0.0001
rasP vs. lytE	<0.0001
rasP vs. mreBHlytE	0.1403
sigI vs. mreBH	<0.0001
sigI vs. lytE	<0.0001
sigI vs. mreBHlytE	<0.0001
mreBH vs. lytE	0.6021
mreBH vs. mreBHlytE	<0.0001
lytE vs. mreBHlytE	<0.0001

## Sheet: 4B
Time (hours)	WT_1	WT_2	WT_3	WT_4	WT_5	WT_6	AVG	SD		ΔrasP_1	ΔrasP_2	ΔrasP_3	ΔrasP_4	ΔrasP_5	AVG	SD		ΔsigI_1	ΔsigI_2	ΔsigI_3	ΔsigI_4	ΔsigI_5	ΔsigI_6	AVG	SD		ΔmreBH_1	ΔmreBH_2	ΔmreBH_3	ΔmreBH_4	ΔmreBH_5	ΔmreBH_6	AVG	SD		ΔlytE_1	ΔlytE_2	ΔlytE_3	ΔlytE_4	ΔlytE_5	ΔlytE_6	ΔlytE_7	ΔlytE_8	ΔlytE_9	ΔlytE_10	ΔlytE_11	AVG	SD
0	0.091	0.091	0.093	0.092	0.092	0.091	0.0916667	0.000816497		0.088	0.09	0.09	0.09	0.089	0.0894	0.000894427		0.091	0.09	0.089	0.091	0.089	0.091	0.0901667	0.000983192		0.095	0.093	0.094	0.088	0.091	0.091	0.092	0.00252982		0.111	0.111	0.108	0.106	0.096	0.095	0.094	0.094	0.09	0.09	0.09	0.0986364	0.00857056
0.25	0.106	0.105	0.107	0.108	0.109	0.111	0.107667	0.00216025		0.092	0.093	0.096	0.103	0.093	0.0954	0.00450555		0.098	0.09	0.092	0.093	0.094	0.095	0.0936667	0.00273252		0.114	0.106	0.099	0.087	0.088	0.089	0.0971667	0.011125		0.11	0.122	0.105	0.096	0.101	0.099	0.094	0.092	0.089	0.089	0.087	0.0985455	0.0105581
0.5	0.116	0.111	0.116	0.113	0.112	0.116	0.114	0.00228035		0.094	0.094	0.097	0.104	0.094	0.0966	0.0043359		0.1	0.091	0.093	0.093	0.093	0.095	0.0941667	0.00312517		0.106	0.101	0.096	0.089	0.089	0.09	0.0951667	0.00713909		0.11	0.122	0.106	0.097	0.098	0.097	0.094	0.092	0.09	0.091	0.09	0.0988182	0.0100381
0.75	0.118	0.114	0.118	0.118	0.114	0.118	0.116667	0.00206559		0.096	0.096	0.099	0.105	0.095	0.0982	0.00408656		0.104	0.093	0.093	0.094	0.093	0.096	0.0955	0.00432435		0.115	0.108	0.099	0.09	0.091	0.093	0.0993333	0.0101719		0.111	0.123	0.107	0.098	0.102	0.102	0.097	0.093	0.091	0.092	0.092	0.100727	0.00985993
1	0.12	0.115	0.122	0.124	0.118	0.121	0.12	0.00316228		0.097	0.098	0.103	0.109	0.097	0.1008	0.00521536		0.104	0.094	0.096	0.096	0.096	0.098	0.0973333	0.00350238		0.113	0.107	0.099	0.091	0.092	0.093	0.0991667	0.00904249		0.108	0.116	0.103	0.098	0.102	0.102	0.097	0.094	0.091	0.092	0.093	0.0996364	0.00760622
1.25	0.112	0.11	0.118	0.12	0.119	0.122	0.116833	0.00475044		0.097	0.096	0.1	0.109	0.097	0.0998	0.00535724		0.108	0.095	0.096	0.097	0.097	0.099	0.0986667	0.00476095		0.114	0.107	0.101	0.092	0.093	0.093	0.1	0.00903327		0.108	0.114	0.103	0.098	0.103	0.103	0.097	0.094	0.092	0.093	0.094	0.0999091	0.00696354
1.5	0.107	0.106	0.12	0.122	0.121	0.124	0.116667	0.00799166		0.094	0.097	0.101	0.108	0.097	0.0994	0.00541295		0.106	0.095	0.097	0.098	0.096	0.1	0.0986667	0.0039833		0.114	0.108	0.1	0.094	0.094	0.095	0.100833	0.0084004		0.106	0.111	0.102	0.099	0.103	0.103	0.098	0.095	0.092	0.093	0.095	0.0997273	0.00588372
1.75	0.11	0.109	0.124	0.126	0.122	0.129	0.12	0.00846168		0.095	0.098	0.103	0.109	0.099	0.1008	0.0054037		0.107	0.096	0.098	0.099	0.097	0.101	0.0996667	0.0039833		0.118	0.11	0.103	0.095	0.096	0.097	0.103167	0.00919601		0.11	0.118	0.106	0.101	0.103	0.105	0.1	0.095	0.092	0.093	0.096	0.101727	0.00784972
2	0.123	0.123	0.13	0.132	0.134	0.14	0.130333	0.00659293		0.1	0.097	0.102	0.112	0.1	0.1022	0.00576194		0.107	0.096	0.098	0.1	0.097	0.101	0.0998333	0.00397073		0.118	0.111	0.104	0.097	0.097	0.099	0.104333	0.00857127		0.11	0.117	0.105	0.102	0.103	0.105	0.099	0.096	0.093	0.094	0.096	0.101818	0.00730504
2.25	0.119	0.119	0.139	0.139	0.14	0.147	0.133833	0.0118729		0.098	0.099	0.104	0.114	0.102	0.1034	0.00638749		0.112	0.097	0.1	0.1	0.098	0.103	0.101667	0.00546504		0.12	0.113	0.105	0.099	0.1	0.102	0.1065	0.00831264		0.113	0.12	0.108	0.103	0.105	0.107	0.101	0.097	0.093	0.094	0.097	0.103455	0.00829896
2.5	0.134	0.134	0.146	0.147	0.147	0.156	0.144	0.0085557		0.102	0.099	0.104	0.114	0.102	0.1042	0.00576194		0.11	0.097	0.1	0.1	0.1	0.103	0.101667	0.00450185		0.124	0.117	0.109	0.102	0.102	0.105	0.109833	0.00893122		0.113	0.118	0.107	0.103	0.106	0.109	0.102	0.098	0.093	0.095	0.097	0.103727	0.00778577
2.75	0.138	0.141	0.155	0.156	0.16	0.171	0.1535	0.012276		0.103	0.097	0.102	0.114	0.102	0.1036	0.00626897		0.111	0.098	0.099	0.1	0.101	0.102	0.101833	0.00470815		0.128	0.12	0.113	0.104	0.105	0.106	0.112667	0.00966782		0.114	0.121	0.109	0.104	0.108	0.111	0.103	0.099	0.094	0.095	0.098	0.105091	0.00841967
3	0.146	0.15	0.168	0.169	0.173	0.186	0.165333	0.0149354		0.103	0.098	0.104	0.114	0.102	0.1042	0.00593296		0.111	0.098	0.1	0.1	0.1	0.104	0.102167	0.00475044		0.127	0.12	0.114	0.108	0.108	0.108	0.114167	0.00790991		0.114	0.12	0.109	0.104	0.107	0.11	0.103	0.099	0.094	0.096	0.099	0.105	0.00793725
3.25	0.157	0.163	0.187	0.186	0.19	0.2	0.1805	0.0167422		0.103	0.098	0.104	0.115	0.102	0.1044	0.00634823		0.112	0.098	0.1	0.101	0.101	0.103	0.1025	0.0049295		0.127	0.122	0.116	0.113	0.113	0.115	0.117667	0.00564506		0.114	0.119	0.109	0.105	0.105	0.108	0.103	0.099	0.095	0.096	0.099	0.104727	0.00747116
3.5	0.166	0.176	0.205	0.202	0.206	0.215	0.195	0.0193494		0.102	0.098	0.104	0.114	0.103	0.1042	0.00593296		0.111	0.098	0.101	0.101	0.102	0.103	0.102667	0.0044121		0.138	0.131	0.124	0.121	0.12	0.121	0.125833	0.00719491		0.115	0.122	0.11	0.106	0.109	0.113	0.105	0.1	0.096	0.097	0.1	0.106636	0.00812739
3.75	0.18	0.2	0.221	0.218	0.226	0.232	0.212833	0.0193744		0.103	0.099	0.105	0.114	0.103	0.1048	0.0055857		0.112	0.098	0.101	0.1	0.101	0.102	0.102333	0.00492612		0.137	0.13	0.126	0.131	0.13	0.128	0.130333	0.0037238		0.116	0.123	0.112	0.107	0.105	0.108	0.103	0.099	0.096	0.098	0.1	0.106091	0.00830005
4	0.196	0.214	0.238	0.232	0.245	0.25	0.229167	0.020498		0.102	0.099	0.106	0.116	0.104	0.1054	0.00646529		0.111	0.098	0.1	0.1	0.099	0.103	0.101833	0.00479236		0.145	0.137	0.133	0.141	0.139	0.137	0.138667	0.00408248		0.118	0.126	0.113	0.108	0.105	0.109	0.104	0.1	0.096	0.098	0.101	0.107091	0.00907143
4.25	0.214	0.228	0.256	0.25	0.266	0.267	0.246833	0.0214515		0.102	0.099	0.105	0.115	0.103	0.1048	0.00609918		0.111	0.098	0.1	0.1	0.099	0.103	0.101833	0.00479236		0.156	0.144	0.14	0.154	0.153	0.147	0.149	0.00632456		0.118	0.125	0.114	0.109	0.106	0.11	0.105	0.1	0.097	0.098	0.101	0.107545	0.00880186
4.5	0.232	0.247	0.268	0.264	0.278	0.274	0.2605	0.0176153		0.104	0.099	0.107	0.118	0.105	0.1066	0.0070214		0.113	0.098	0.101	0.099	0.101	0.103	0.1025	0.00543139		0.168	0.154	0.148	0.168	0.17	0.163	0.161833	0.0089088		0.12	0.129	0.115	0.11	0.106	0.111	0.106	0.101	0.096	0.098	0.101	0.108455	0.0099736
4.75	0.259	0.271	0.257	0.258	0.269	0.26	0.262333	0.0060553		0.105	0.099	0.105	0.118	0.104	0.1062	0.00704982		0.114	0.099	0.099	0.098	0.099	0.102	0.101833	0.00611283		0.18	0.159	0.156	0.185	0.189	0.177	0.174333	0.0137064		0.122	0.13	0.117	0.111	0.106	0.11	0.106	0.101	0.097	0.098	0.101	0.109	0.0104403
5	0.272	0.283	0.25	0.245	0.264	0.25	0.260667	0.0149086		0.105	0.098	0.103	0.116	0.104	0.1052	0.0066106		0.115	0.099	0.098	0.098	0.099	0.102	0.101833	0.00661564		0.189	0.167	0.16	0.2	0.205	0.193	0.185667	0.0181732		0.116	0.123	0.113	0.109	0.107	0.111	0.107	0.101	0.097	0.099	0.102	0.107727	0.0078242
5.25	0.266	0.27	0.252	0.246	0.263	0.246	0.257167	0.0105151		0.105	0.1	0.11	0.119	0.105	0.1078	0.00719027		0.114	0.098	0.101	0.099	0.101	0.103	0.102667	0.00581951		0.205	0.176	0.169	0.22	0.223	0.211	0.200667	0.0228444		0.118	0.125	0.114	0.11	0.107	0.111	0.106	0.101	0.098	0.099	0.102	0.108273	0.00841535
5.5	0.262	0.262	0.244	0.239	0.255	0.236	0.249667	0.0115355		0.106	0.099	0.106	0.115	0.103	0.1058	0.00589067		0.115	0.099	0.099	0.097	0.099	0.102	0.101833	0.0066458		0.216	0.183	0.174	0.228	0.234	0.228	0.2105	0.0256262		0.118	0.125	0.115	0.11	0.107	0.111	0.106	0.102	0.098	0.1	0.103	0.108636	0.00822524
5.75	0.255	0.253	0.241	0.234	0.251	0.232	0.244333	0.0100333		0.105	0.1	0.108	0.12	0.106	0.1078	0.00742967		0.115	0.099	0.101	0.098	0.102	0.105	0.103333	0.00621825		0.228	0.187	0.177	0.22	0.224	0.229	0.210833	0.0227808		0.122	0.131	0.118	0.114	0.107	0.112	0.106	0.102	0.098	0.1	0.103	0.110273	0.0102478
6	0.248	0.242	0.236	0.226	0.248	0.226	0.237667	0.0100731		0.106	0.099	0.106	0.118	0.104	0.1066	0.0069857		0.114	0.099	0.099	0.097	0.1	0.103	0.102	0.00619677		0.242	0.192	0.18	0.208	0.216	0.215	0.208833	0.0214701		0.122	0.129	0.118	0.113	0.107	0.111	0.107	0.102	0.098	0.1	0.103	0.11	0.00976729
6.25	0.242	0.234	0.239	0.227	0.248	0.225	0.235833	0.00888632		0.107	0.099	0.108	0.116	0.103	0.1066	0.00634823		0.116	0.099	0.099	0.097	0.099	0.102	0.102	0.00704273		0.243	0.196	0.181	0.201	0.209	0.205	0.205833	0.0206341		0.123	0.13	0.119	0.114	0.107	0.112	0.107	0.102	0.099	0.1	0.103	0.110545	0.0100932
6.5	0.238	0.229	0.243	0.229	0.258	0.23	0.237833	0.0114091		0.106	0.099	0.107	0.118	0.104	0.1068	0.00697854		0.114	0.098	0.099	0.097	0.1	0.102	0.101667	0.00628225		0.23	0.19	0.175	0.191	0.199	0.197	0.197	0.0182318		0.122	0.13	0.118	0.113	0.108	0.112	0.107	0.103	0.099	0.101	0.104	0.110636	0.00957364
6.75	0.239	0.229	0.248	0.233	0.267	0.237	0.242167	0.0137465		0.107	0.099	0.106	0.118	0.104	0.1068	0.00697854		0.117	0.099	0.099	0.096	0.099	0.102	0.102	0.00758947		0.21	0.174	0.157	0.181	0.189	0.188	0.183167	0.0176115		0.124	0.132	0.119	0.115	0.107	0.112	0.106	0.103	0.099	0.101	0.104	0.111091	0.0104351
7	0.246	0.235	0.257	0.241	0.28	0.247	0.251	0.0159625		0.107	0.098	0.105	0.119	0.104	0.1066	0.00770065		0.114	0.098	0.098	0.096	0.1	0.102	0.101333	0.00653197		0.201	0.16	0.144	0.174	0.182	0.178	0.173167	0.0194979		0.12	0.127	0.117	0.114	0.109	0.114	0.108	0.103	0.1	0.102	0.104	0.110727	0.00847456
7.25	0.257	0.244	0.274	0.255	0.296	0.258	0.264	0.0183848		0.108	0.099	0.108	0.119	0.104	0.1076	0.00736885		0.115	0.098	0.099	0.096	0.1	0.102	0.101667	0.0068313		0.193	0.15	0.136	0.169	0.178	0.173	0.1665	0.020423		0.125	0.134	0.121	0.116	0.111	0.117	0.11	0.105	0.101	0.102	0.105	0.113364	0.0103853
7.5	0.264	0.252	0.288	0.267	0.315	0.273	0.2765	0.0222419		0.106	0.099	0.107	0.122	0.105	0.1078	0.00852643		0.115	0.098	0.099	0.096	0.101	0.104	0.102167	0.00685322		0.184	0.142	0.129	0.167	0.176	0.17	0.161333	0.0212383		0.122	0.129	0.119	0.115	0.11	0.116	0.109	0.105	0.101	0.103	0.105	0.112182	0.00880702
7.75	0.276	0.263	0.307	0.283	0.337	0.287	0.292167	0.0262786		0.105	0.099	0.107	0.122	0.106	0.1078	0.00852643		0.115	0.098	0.099	0.096	0.101	0.103	0.102	0.00681175		0.179	0.137	0.125	0.169	0.179	0.171	0.16	0.023143		0.123	0.13	0.119	0.116	0.11	0.116	0.11	0.105	0.101	0.103	0.106	0.112636	0.00903629
8	0.299	0.283	0.324	0.298	0.359	0.3	0.3105	0.0271643		0.106	0.099	0.107	0.119	0.105	0.1072	0.00729383		0.116	0.099	0.099	0.095	0.1	0.102	0.101833	0.00730525		0.176	0.134	0.123	0.172	0.182	0.174	0.160167	0.0249993		0.123	0.13	0.12	0.117	0.109	0.115	0.109	0.106	0.101	0.103	0.106	0.112636	0.00911343
8.25	0.315	0.299	0.348	0.318	0.383	0.317	0.33	0.0304368		0.105	0.099	0.109	0.119	0.104	0.1072	0.00749667		0.115	0.098	0.1	0.097	0.1	0.102	0.102	0.00660303		0.18	0.135	0.124	0.175	0.187	0.178	0.163167	0.0266039		0.126	0.132	0.121	0.119	0.111	0.118	0.111	0.107	0.101	0.104	0.107	0.114273	0.00970661
8.5	0.339	0.319	0.368	0.337	0.411	0.338	0.352	0.032912		0.106	0.098	0.106	0.119	0.104	0.1066	0.00766812		0.114	0.098	0.098	0.096	0.1	0.104	0.101667	0.00662319		0.181	0.133	0.123	0.18	0.193	0.183	0.1655	0.0295821		0.125	0.131	0.121	0.119	0.111	0.117	0.111	0.107	0.102	0.104	0.107	0.114091	0.00923531
8.75	0.363	0.341	0.392	0.359	0.441	0.357	0.3755	0.0361206		0.107	0.098	0.106	0.119	0.104	0.1068	0.00766159		0.116	0.098	0.099	0.097	0.1	0.103	0.102167	0.00708284		0.186	0.133	0.123	0.188	0.202	0.191	0.1705	0.0335306		0.126	0.132	0.122	0.12	0.111	0.119	0.111	0.108	0.102	0.105	0.108	0.114909	0.00948108
9	0.389	0.365	0.416	0.38	0.477	0.377	0.400667	0.0411274		0.107	0.097	0.104	0.118	0.103	0.1058	0.00772658		0.117	0.099	0.098	0.097	0.099	0.103	0.102167	0.00754763		0.192	0.134	0.124	0.194	0.208	0.198	0.175	0.0361939		0.128	0.133	0.123	0.122	0.111	0.118	0.111	0.109	0.103	0.106	0.108	0.115636	0.00975984
9.25	0.416	0.39	0.447	0.405	0.513	0.399	0.428333	0.0459202		0.108	0.098	0.106	0.118	0.103	0.1066	0.0074027		0.116	0.099	0.098	0.099	0.1	0.103	0.1025	0.00683374		0.199	0.134	0.125	0.201	0.217	0.208	0.180667	0.0402327		0.125	0.131	0.122	0.122	0.112	0.118	0.111	0.11	0.104	0.108	0.109	0.115636	0.00845308
9.5	0.448	0.418	0.483	0.434	0.553	0.427	0.4605	0.0506942		0.11	0.099	0.108	0.119	0.104	0.108	0.00744983		0.119	0.099	0.1	0.1	0.1	0.104	0.103667	0.00771146		0.208	0.137	0.126	0.209	0.225	0.216	0.186833	0.04343		0.128	0.134	0.124	0.125	0.112	0.119	0.112	0.111	0.105	0.108	0.109	0.117	0.00949737
9.75	0.482	0.444	0.516	0.463	0.595	0.457	0.492833	0.0559479		0.111	0.097	0.105	0.118	0.102	0.1066	0.00814248		0.121	0.1	0.098	0.101	0.099	0.104	0.103833	0.00865833		0.218	0.138	0.127	0.217	0.234	0.226	0.193333	0.0476473		0.125	0.129	0.12	0.127	0.112	0.12	0.112	0.112	0.105	0.109	0.111	0.116545	0.00801703
10	0.513	0.47	0.553	0.496	0.632	0.487	0.525167	0.0594758		0.109	0.098	0.106	0.118	0.103	0.1068	0.00746324		0.122	0.101	0.099	0.103	0.099	0.105	0.104833	0.00872735		0.229	0.14	0.129	0.225	0.243	0.235	0.200167	0.0513436		0.126	0.132	0.123	0.128	0.112	0.12	0.112	0.114	0.106	0.111	0.112	0.117818	0.00840022
10.25	0.545	0.496	0.585	0.53	0.663	0.519	0.556333	0.0600922		0.108	0.097	0.103	0.116	0.102	0.1052	0.00719027		0.119	0.099	0.098	0.104	0.1	0.107	0.1045	0.00786766		0.24	0.143	0.131	0.233	0.252	0.246	0.2075	0.0551026		0.13	0.135	0.125	0.133	0.113	0.122	0.113	0.118	0.107	0.114	0.113	0.120273	0.00937114
10.5	0.58	0.524	0.624	0.569	0.696	0.55	0.5905	0.0614614		0.109	0.099	0.107	0.115	0.101	0.1062	0.00641872		0.125	0.1	0.101	0.11	0.099	0.107	0.107	0.00981835		0.25	0.145	0.134	0.241	0.261	0.257	0.214667	0.0587219		0.13	0.136	0.127	0.137	0.113	0.121	0.113	0.121	0.108	0.117	0.115	0.121636	0.00970848
10.75	0.6	0.541	0.654	0.608	0.731	0.582	0.619333	0.0658837		0.103	0.099	0.108	0.115	0.102	0.1054	0.00626897		0.129	0.102	0.102	0.14	0.099	0.109	0.1135	0.0169558		0.263	0.15	0.138	0.248	0.269	0.267	0.2225	0.0613669		0.131	0.139	0.129	0.143	0.115	0.126	0.115	0.128	0.109	0.119	0.117	0.124636	0.0106609
11	0.636	0.572	0.687	0.641	0.752	0.616	0.650667	0.0621085		0.108	0.099	0.109	0.118	0.103	0.1074	0.0071624		0.133	0.099	0.103	0.118	0.101	0.115	0.1115	0.0130805		0.274	0.154	0.141	0.256	0.278	0.277	0.23	0.0645322		0.128	0.138	0.129	0.155	0.115	0.124	0.114	0.131	0.112	0.125	0.117	0.126182	0.0125285
11.25	0.669	0.598	0.711	0.668	0.772	0.644	0.677	0.0594239		0.11	0.098	0.107	0.116	0.101	0.1064	0.0071624		0.133	0.099	0.102	0.173	0.099	0.118	0.120667	0.0289321		0.284	0.158	0.145	0.262	0.286	0.286	0.236833	0.0668443		0.131	0.142	0.131	0.16	0.115	0.125	0.114	0.141	0.112	0.132	0.121	0.129455	0.0144178
11.5	0.695	0.62	0.735	0.704	0.794	0.674	0.703667	0.0584762		0.109	0.098	0.107	0.116	0.102	0.1064	0.0068775		0.145	0.099	0.104	0.18	0.099	0.123	0.125	0.0323172		0.296	0.164	0.15	0.269	0.293	0.295	0.2445	0.068652		0.132	0.147	0.135	0.184	0.116	0.126	0.115	0.153	0.115	0.139	0.122	0.134909	0.0207483
11.75	0.715	0.634	0.757	0.737	0.817	0.706	0.727667	0.0605497		0.104	0.099	0.109	0.117	0.102	0.1062	0.00704982		0.154	0.103	0.106	0.198	0.1	0.13	0.131833	0.0384313		0.309	0.17	0.156	0.275	0.301	0.304	0.2525	0.0704578		0.132	0.149	0.138	0.193	0.117	0.128	0.116	0.164	0.117	0.156	0.127	0.139727	0.0239503
12	0.743	0.658	0.777	0.755	0.838	0.731	0.750333	0.0589429		0.104	0.099	0.108	0.118	0.102	0.1062	0.00736206		0.158	0.102	0.109	0.157	0.101	0.138	0.1275	0.0268533		0.32	0.178	0.162	0.282	0.309	0.314	0.260833	0.0717284		0.137	0.164	0.145	0.229	0.118	0.13	0.117	0.178	0.121	0.171	0.129	0.149	0.0341174
12.25	0.759	0.684	0.797	0.778	0.86	0.754	0.772	0.0576923		0.104	0.099	0.109	0.119	0.104	0.107	0.00758288		0.158	0.101	0.115	0.213	0.101	0.15	0.139667	0.0434035		0.329	0.185	0.168	0.288	0.316	0.321	0.267833	0.0722812		0.138	0.182	0.15	0.245	0.118	0.129	0.116	0.202	0.123	0.197	0.135	0.157727	0.0424549
12.5	0.787	0.71	0.814	0.798	0.878	0.775	0.793667	0.0546577		0.109	0.098	0.108	0.117	0.102	0.1068	0.00725948		0.186	0.101	0.116	0.259	0.101	0.164	0.1545	0.0619831		0.342	0.194	0.177	0.294	0.327	0.329	0.277167	0.0729477		0.142	0.194	0.158	0.249	0.121	0.135	0.119	0.245	0.127	0.224	0.142	0.168727	0.050128
12.75	0.799	0.728	0.836	0.819	0.899	0.797	0.813	0.0559249		0.104	0.098	0.108	0.119	0.103	0.1064	0.00789303		0.199	0.103	0.126	0.231	0.102	0.182	0.157167	0.0543449		0.352	0.202	0.184	0.303	0.34	0.342	0.287167	0.0750318		0.138	0.221	0.163	0.275	0.125	0.136	0.121	0.289	0.133	0.264	0.151	0.183273	0.0656279
13	0.82	0.752	0.852	0.839	0.918	0.816	0.832833	0.0541125		0.107	0.099	0.109	0.12	0.103	0.1076	0.00792465		0.237	0.104	0.131	0.25	0.103	0.195	0.17	0.0661513		0.367	0.215	0.196	0.311	0.35	0.354	0.298833	0.0749117		0.145	0.25	0.191	0.29	0.127	0.14	0.126	0.324	0.137	0.281	0.167	0.198	0.0742038
13.25	0.838	0.772	0.872	0.86	0.938	0.838	0.853	0.0541221		0.106	0.099	0.11	0.121	0.104	0.108	0.00827647		0.257	0.104	0.158	0.289	0.104	0.214	0.187667	0.0782935		0.382	0.227	0.204	0.321	0.362	0.366	0.310333	0.0765106		0.149	0.289	0.205	0.313	0.133	0.142	0.127	0.338	0.147	0.312	0.178	0.212091	0.083529
13.5	0.858	0.795	0.886	0.879	0.954	0.855	0.871167	0.0517278		0.109	0.098	0.109	0.118	0.103	0.1074	0.00750333		0.296	0.106	0.153	0.323	0.105	0.24	0.203833	0.0958403		0.398	0.24	0.214	0.332	0.374	0.378	0.322667	0.0775904		0.149	0.317	0.222	0.339	0.15	0.15	0.134	0.359	0.155	0.338	0.206	0.229	0.0908768
13.75	0.88	0.813	0.907	0.899	0.978	0.878	0.8925	0.0533845		0.108	0.1	0.11	0.121	0.105	0.1088	0.00779102		0.337	0.101	0.187	0.32	0.107	0.256	0.218	0.102937		0.417	0.254	0.226	0.343	0.388	0.391	0.3365	0.0789449		0.157	0.322	0.234	0.358	0.158	0.161	0.141	0.395	0.167	0.368	0.221	0.243818	0.0981212
14	0.9	0.834	0.922	0.918	0.994	0.899	0.911167	0.0514837		0.111	0.099	0.109	0.12	0.104	0.1086	0.00789303		0.36	0.101	0.2	0.359	0.108	0.267	0.2325	0.116015		0.437	0.266	0.238	0.355	0.399	0.405	0.35	0.0807713		0.162	0.345	0.253	0.381	0.17	0.182	0.158	0.426	0.183	0.396	0.239	0.263182	0.104124
14.25	0.919	0.854	0.939	0.937	1.01	0.916	0.929167	0.0502371		0.113	0.1	0.11	0.122	0.106	0.1102	0.00819756		0.388	0.103	0.229	0.377	0.112	0.28	0.248167	0.124215		0.457	0.28	0.25	0.368	0.413	0.419	0.3645	0.0826335		0.171	0.375	0.272	0.405	0.201	0.189	0.172	0.452	0.204	0.417	0.259	0.283364	0.108271
14.5	0.934	0.873	0.956	0.956	1.028	0.936	0.947167	0.0499777		0.111	0.1	0.112	0.125	0.108	0.1112	0.00903881		0.417	0.102	0.25	0.423	0.115	0.294	0.266833	0.140131		0.479	0.298	0.263	0.38	0.429	0.435	0.380667	0.0844243		0.177	0.4	0.292	0.431	0.228	0.222	0.189	0.474	0.218	0.437	0.28	0.304364	0.110409
14.75	0.952	0.891	0.972	0.974	1.042	0.955	0.964333	0.0485826		0.11	0.099	0.11	0.122	0.105	0.1092	0.00846759		0.449	0.104	0.28	0.467	0.116	0.309	0.2875	0.156144		0.5	0.314	0.275	0.393	0.444	0.448	0.395667	0.0862523		0.184	0.423	0.313	0.455	0.264	0.246	0.217	0.497	0.226	0.458	0.307	0.326364	0.112041
15	0.97	0.911	0.989	0.994	1.06	0.973	0.982833	0.0480392		0.112	0.1	0.113	0.122	0.106	0.1106	0.00823408		0.488	0.104	0.319	0.504	0.121	0.331	0.311167	0.172041		0.518	0.331	0.288	0.407	0.457	0.462	0.4105	0.0868441		0.192	0.44	0.33	0.478	0.316	0.288	0.252	0.518	0.243	0.477	0.331	0.351364	0.109816
15.25	0.988	0.929	1	1.006	1.072	0.991	0.997667	0.0457238		0.112	0.099	0.11	0.123	0.106	0.11	0.00880341		0.528	0.104	0.333	0.529	0.125	0.353	0.328667	0.185706		0.541	0.352	0.305	0.422	0.473	0.478	0.4285	0.0874454		0.203	0.468	0.356	0.508	0.35	0.302	0.282	0.536	0.265	0.495	0.354	0.374455	0.111241
15.5	1.004	0.948	1.016	1.028	1.086	1.008	1.015	0.0444297		0.111	0.1	0.111	0.121	0.105	0.1096	0.0078613		0.563	0.105	0.352	0.584	0.133	0.379	0.352667	0.203981		0.568	0.381	0.323	0.439	0.491	0.498	0.45	0.088227		0.213	0.494	0.377	0.534	0.374	0.331	0.304	0.561	0.284	0.515	0.378	0.396818	0.113981
15.75	1.02	0.965	1.03	1.044	1.092	1.024	1.02917	0.0409801		0.11	0.099	0.111	0.122	0.105	0.1094	0.00850294		0.595	0.105	0.383	0.635	0.141	0.403	0.377	0.221124		0.592	0.411	0.345	0.454	0.506	0.514	0.470333	0.0865764		0.223	0.511	0.401	0.558	0.395	0.352	0.337	0.583	0.306	0.537	0.404	0.418818	0.114947
16	1.034	0.985	1.04	1.058	1.102	1.044	1.04383	0.0378334		0.111	0.101	0.114	0.124	0.107	0.1114	0.00856154		0.624	0.106	0.427	0.68	0.151	0.432	0.403333	0.236093		0.619	0.447	0.371	0.472	0.526	0.535	0.495	0.0850247		0.235	0.535	0.427	0.583	0.425	0.377	0.364	0.606	0.328	0.559	0.431	0.442727	0.116575
16.25	1.05	1	1.048	1.072	1.104	1.058	1.05533	0.0340509		0.111	0.1	0.113	0.121	0.106	0.1102	0.00785493		0.652	0.108	0.473	0.719	0.164	0.459	0.429167	0.24897		0.642	0.483	0.396	0.49	0.545	0.554	0.518333	0.0828171		0.249	0.558	0.453	0.607	0.449	0.403	0.393	0.628	0.348	0.579	0.454	0.465545	0.117588
16.5	1.062	1.022	1.052	1.08	1.108	1.068	1.06533	0.0286682		0.114	0.099	0.111	0.121	0.106	0.1102	0.00828855		0.681	0.11	0.514	0.756	0.179	0.488	0.454667	0.261323		0.668	0.529	0.428	0.507	0.563	0.573	0.544667	0.0795303		0.263	0.583	0.482	0.633	0.48	0.434	0.423	0.655	0.373	0.601	0.479	0.491455	0.119058
16.75	1.076	1.038	1.056	1.088	1.11	1.08	1.07467	0.0250971		0.112	0.1	0.112	0.121	0.105	0.11	0.00796869		0.707	0.111	0.557	0.79	0.19	0.52	0.479167	0.274013		0.693	0.57	0.461	0.526	0.581	0.591	0.570333	0.076821		0.276	0.603	0.51	0.655	0.503	0.459	0.448	0.677	0.402	0.624	0.508	0.515	0.119667
17	1.084	1.056	1.062	1.098	1.116	1.092	1.08467	0.0225802		0.113	0.101	0.114	0.126	0.108	0.1124	0.0091815		0.733	0.114	0.602	0.825	0.211	0.553	0.506333	0.284747		0.712	0.612	0.492	0.544	0.596	0.607	0.593833	0.0739254		0.291	0.627	0.538	0.681	0.528	0.486	0.474	0.699	0.425	0.644	0.532	0.538636	0.120928
17.25	1.092	1.074	1.064	1.102	1.119	1.096	1.09117	0.0197425		0.113	0.1	0.113	0.123	0.106	0.111	0.00863134		0.761	0.116	0.643	0.862	0.232	0.583	0.532833	0.296417		0.737	0.659	0.527	0.564	0.613	0.625	0.620833	0.0735729		0.307	0.65	0.565	0.704	0.552	0.517	0.504	0.723	0.451	0.665	0.556	0.563091	0.121369
17.5	1.098	1.09	1.066	1.106	1.122	1.102	1.09733	0.0186619		0.115	0.102	0.116	0.125	0.108	0.1132	0.00870057		0.789	0.12	0.681	0.895	0.257	0.61	0.558667	0.305681		0.759	0.698	0.557	0.582	0.631	0.642	0.644833	0.0744618		0.324	0.671	0.59	0.722	0.576	0.544	0.53	0.748	0.479	0.688	0.58	0.586545	0.121454
17.75	1.102	1.102	1.068	1.11	1.123	1.104	1.1015	0.0182401		0.113	0.102	0.115	0.123	0.107	0.112	0.008		0.815	0.124	0.717	0.925	0.271	0.642	0.582333	0.316306		0.777	0.733	0.585	0.599	0.647	0.658	0.6665	0.075211		0.345	0.697	0.616	0.745	0.599	0.571	0.554	0.77	0.504	0.708	0.604	0.610273	0.121371
18	1.106	1.121	1.07	1.114	1.125	1.11	1.10767	0.0197248		0.113	0.102	0.116	0.125	0.108	0.1128	0.00864292		0.843	0.128	0.753	0.951	0.288	0.672	0.605833	0.325812		0.793	0.765	0.607	0.614	0.664	0.675	0.686333	0.0770965		0.358	0.711	0.633	0.762	0.619	0.594	0.578	0.791	0.529	0.727	0.627	0.629909	0.121507
18.25	1.112	1.135	1.072	1.117	1.129	1.116	1.1135	0.0221156		0.111	0.101	0.114	0.125	0.108	0.1118	0.00881476		0.869	0.134	0.785	0.975	0.304	0.701	0.628	0.33391		0.816	0.799	0.632	0.632	0.679	0.691	0.708167	0.0807797		0.387	0.736	0.662	0.786	0.643	0.622	0.603	0.817	0.554	0.747	0.65	0.655182	0.120194
18.5	1.114	1.143	1.072	1.12	1.131	1.121	1.11683	0.0242109		0.116	0.101	0.115	0.125	0.108	0.113	0.00902774		0.894	0.146	0.819	1.01	0.325	0.728	0.653667	0.341567		0.835	0.826	0.654	0.65	0.696	0.709	0.728333	0.0824589		0.407	0.75	0.681	0.8	0.665	0.645	0.626	0.836	0.578	0.77	0.674	0.675636	0.118686
18.75	1.112	1.147	1.074	1.124	1.131	1.124	1.11867	0.0247036		0.11	0.101	0.116	0.126	0.11	0.1126	0.00920869		0.916	0.157	0.853	1.034	0.352	0.751	0.677167	0.345557		0.857	0.849	0.676	0.666	0.712	0.724	0.747333	0.0846869		0.433	0.776	0.705	0.817	0.688	0.67	0.652	0.855	0.599	0.788	0.695	0.698	0.116652
19	1.124	1.159	1.074	1.127	1.131	1.129	1.124	0.0275971		0.116	0.102	0.118	0.128	0.112	0.1152	0.00944458		0.935	0.168	0.886	1.064	0.377	0.776	0.701	0.350839		0.884	0.879	0.701	0.684	0.728	0.742	0.769667	0.0889734		0.464	0.802	0.729	0.837	0.715	0.7	0.679	0.876	0.625	0.806	0.716	0.722636	0.113504
19.25	1.12	1.163	1.076	1.129	1.131	1.133	1.12533	0.0282324		0.11	0.103	0.119	0.127	0.111	0.114	0.00921954		0.958	0.184	0.913	1.094	0.399	0.802	0.725	0.355156		0.906	0.903	0.729	0.699	0.744	0.759	0.79	0.0908889		0.491	0.82	0.748	0.85	0.74	0.727	0.705	0.895	0.648	0.821	0.735	0.743636	0.109949
19.5	1.127	1.173	1.076	1.131	1.131	1.135	1.12883	0.0309607		0.117	0.103	0.12	0.129	0.113	0.1164	0.0095289		0.973	0.194	0.938	1.122	0.422	0.825	0.745667	0.359358		0.926	0.928	0.753	0.716	0.762	0.775	0.81	0.0927297		0.515	0.834	0.769	0.869	0.765	0.753	0.731	0.917	0.669	0.833	0.755	0.764545	0.107905
19.75	1.125	1.175	1.074	1.131	1.131	1.141	1.1295	0.0325807		0.112	0.102	0.121	0.129	0.112	0.1152	0.0102323		0.994	0.214	0.961	1.151	0.442	0.845	0.767833	0.3617		0.951	0.95	0.779	0.733	0.779	0.794	0.831	0.0948072		0.543	0.853	0.791	0.888	0.788	0.783	0.758	0.939	0.69	0.846	0.776	0.786818	0.105395
20	1.129	1.185	1.076	1.133	1.129	1.139	1.13183	0.034678		0.116	0.103	0.121	0.128	0.113	0.1162	0.00931128		1.018	0.241	0.987	1.179	0.461	0.863	0.7915	0.362511		0.975	0.972	0.801	0.75	0.794	0.81	0.850333	0.0976169		0.566	0.866	0.809	0.906	0.814	0.808	0.782	0.962	0.71	0.864	0.795	0.807455	0.104339
20.25	1.131	1.189	1.074	1.131	1.127	1.141	1.13217	0.0366629		0.118	0.102	0.121	0.129	0.113	0.1166	0.010015		1.044	0.284	1.016	1.205	0.479	0.88	0.818	0.358879		0.994	0.99	0.819	0.767	0.812	0.827	0.868167	0.0981619		0.588	0.885	0.825	0.922	0.839	0.834	0.807	0.984	0.732	0.879	0.813	0.828	0.103281
20.5	1.131	1.193	1.076	1.133	1.127	1.145	1.13417	0.0374829		0.117	0.103	0.124	0.135	0.119	0.1196	0.0116103		1.066	0.315	1.042	1.229	0.497	0.898	0.841167	0.357724		1.014	1.01	0.84	0.785	0.83	0.847	0.887667	0.098709		0.613	0.905	0.844	0.942	0.859	0.858	0.83	1.004	0.754	0.896	0.83	0.848636	0.101817
20.75	1.131	1.199	1.072	1.133	1.125	1.147	1.1345	0.0408105		0.121	0.104	0.126	0.137	0.122	0.122	0.0118954		1.088	0.341	1.07	1.252	0.512	0.918	0.8635	0.358749		1.03	1.03	0.856	0.8	0.844	0.858	0.903	0.10058		0.63	0.913	0.856	0.954	0.877	0.88	0.85	1.024	0.774	0.912	0.845	0.865	0.101141
21	1.133	1.201	1.072	1.135	1.127	1.153	1.13683	0.0417057		0.121	0.105	0.129	0.142	0.124	0.1242	0.0134052		1.112	0.36	1.098	1.272	0.525	0.936	0.883833	0.361797		1.052	1.05	0.881	0.82	0.865	0.878	0.924333	0.10052		0.656	0.94	0.878	0.976	0.896	0.902	0.87	1.048	0.791	0.926	0.861	0.885818	0.101037
21.25	1.131	1.205	1.074	1.137	1.123	1.151	1.13683	0.0424755		0.124	0.107	0.135	0.143	0.127	0.1272	0.0134981		1.133	0.391	1.131	1.294	0.535	0.954	0.906333	0.362731		1.07	1.068	0.901	0.836	0.881	0.893	0.9415	0.101289		0.67	0.948	0.889	0.987	0.913	0.922	0.888	1.068	0.806	0.938	0.877	0.900545	0.101351
21.5	1.135	1.211	1.07	1.137	1.124	1.151	1.138	0.0454489		0.128	0.108	0.137	0.147	0.132	0.1304	0.0143979		1.159	0.427	1.157	1.308	0.544	0.973	0.928	0.360745		1.086	1.084	0.923	0.852	0.897	0.911	0.958833	0.100645		0.694	0.973	0.91	1.008	0.933	0.945	0.906	1.09	0.823	0.954	0.893	0.920818	0.101442
21.75	1.131	1.213	1.07	1.137	1.123	1.155	1.13817	0.0465034		0.133	0.109	0.142	0.154	0.136	0.1348	0.0165136		1.183	0.464	1.183	1.324	0.555	0.995	0.950667	0.358524		1.102	1.104	0.946	0.871	0.915	0.927	0.9775	0.100293		0.715	0.993	0.93	1.028	0.956	0.972	0.932	1.114	0.84	0.968	0.909	0.941545	0.102282
22	1.133	1.215	1.07	1.135	1.12	1.155	1.138	0.0473286		0.14	0.111	0.148	0.16	0.144	0.1406	0.0181604		1.205	0.504	1.207	1.336	0.564	1.014	0.971667	0.354757		1.112	1.116	0.966	0.887	0.932	0.945	0.993	0.097242		0.733	1.008	0.946	1.044	0.974	0.991	0.951	1.131	0.858	0.985	0.926	0.958818	0.10185
22.25	1.127	1.217	1.07	1.135	1.118	1.155	1.137	0.048328		0.143	0.113	0.154	0.168	0.15	0.1456	0.0203789		1.227	0.538	1.231	1.348	0.574	1.034	0.992	0.352615		1.125	1.131	0.989	0.903	0.948	0.961	1.0095	0.0959161		0.754	1.028	0.963	1.06	0.994	1.016	0.972	1.151	0.873	0.996	0.941	0.977091	0.10198
22.5	1.125	1.215	1.066	1.133	1.114	1.157	1.135	0.0493761		0.147	0.115	0.162	0.176	0.163	0.1526	0.0233944		1.247	0.579	1.25	1.359	0.581	1.052	1.01133	0.348461		1.135	1.145	1.006	0.921	0.966	0.978	1.02517	0.0931309		0.777	1.046	0.983	1.076	1.01	1.036	0.991	1.169	0.889	1.01	0.955	0.994727	0.101039
22.75	1.129	1.221	1.062	1.133	1.112	1.157	1.13567	0.0524887		0.162	0.118	0.171	0.187	0.171	0.1618	0.0260902		1.26	0.615	1.27	1.369	0.592	1.072	1.02967	0.343876		1.143	1.153	1.028	0.936	0.979	0.99	1.03817	0.0900431		0.796	1.066	1.002	1.092	1.03	1.056	1.012	1.183	0.905	1.022	0.969	1.01209	0.100484
23	1.127	1.221	1.062	1.135	1.108	1.159	1.13533	0.0530911		0.169	0.122	0.18	0.198	0.183	0.1704	0.0289707		1.276	0.649	1.288	1.377	0.603	1.094	1.04783	0.339755		1.159	1.165	1.048	0.953	0.997	1.004	1.05433	0.088692		0.815	1.084	1.02	1.104	1.048	1.078	1.03	1.197	0.919	1.036	0.984	1.02864	0.0998431
23.25	1.127	1.225	1.058	1.129	1.106	1.159	1.134	0.0557494		0.181	0.124	0.186	0.207	0.193	0.1782	0.0318387		1.292	0.681	1.302	1.387	0.612	1.112	1.06433	0.336527		1.169	1.173	1.066	0.972	1.012	1.02	1.06867	0.0847152		0.826	1.096	1.038	1.116	1.068	1.1	1.052	1.209	0.938	1.052	1	1.045	0.0998369
23.5	1.119	1.221	1.056	1.129	1.102	1.159	1.131	0.0556741		0.194	0.13	0.197	0.218	0.204	0.1886	0.0340412		1.304	0.713	1.316	1.395	0.622	1.129	1.07983	0.33225		1.175	1.181	1.082	0.986	1.028	1.032	1.08067	0.0813281		0.849	1.114	1.058	1.125	1.084	1.121	1.07	1.223	0.952	1.064	1.016	1.06145	0.0980942
23.75	1.125	1.227	1.052	1.125	1.098	1.159	1.131	0.0589949		0.218	0.136	0.207	0.231	0.218	0.202	0.0378616		1.316	0.742	1.33	1.403	0.631	1.147	1.09483	0.329101		1.187	1.191	1.1	1.002	1.04	1.042	1.09367	0.0802214		0.869	1.127	1.076	1.139	1.106	1.145	1.092	1.238	0.968	1.076	1.03	1.07873	0.0976105
24	1.116	1.225	1.054	1.131	1.102	1.157	1.13083	0.0574575		0.239	0.142	0.219	0.244	0.231	0.215	0.0418868		1.33	0.774	1.326	1.399	0.651	1.145	1.10417	0.31723		1.175	1.193	1.096	1.016	1.048	1.054	1.097	0.0722662		0.885	1.139	1.092	1.147	1.112	1.149	1.1	1.236	0.988	1.092	1.046	1.08964	0.0924135
																		1.336	0.799														#DIV/0!	#DIV/0!		0.903	1.153	1.106	1.159								1.08025	0.120519
																		1.345	0.824														#DIV/0!	#DIV/0!		0.916	1.157	1.117	1.167								1.08925	0.117503
																		1.355	0.851														#DIV/0!	#DIV/0!		0.938	1.169	1.127	1.177								1.10275	0.112001
																		1.365	0.88														#DIV/0!	#DIV/0!		0.928	1.155	1.114	1.161								1.0895	0.109674
																		1.37	0.908
																		1.377	0.933
																		1.387	0.958
																		1.389	0.977
																		1.397	1.002
																		1.403	1.028
																		1.405	1.048
																		1.411	1.072
																		1.413	1.09
																		1.417	1.108
																		1.421	1.125
																		1.425	1.147
																		1.423	1.155
																		1.421	1.169
																		1.427	1.183
																		1.425	1.193
																		1.427	1.207
																		1.425	1.215
																		1.425	1.227
																		1.413	1.215
[truncated: 12 more columns]

## Sheet: 4D
	Lysis time (hours)
	AVG	SD
WT	4.48	0.48
ΔrasP	7.73	0.63
ΔponA	4.39	0.5
ΔsigI	6.75	0.66
ΔmreBH	7.25	1.25
ΔlytE	7.91	0.72
ΔsigVΔsigWΔ25ftsL	4.38	0.75
Biological Replicate values:																	AVG	SD
WT	3.5	4	4	4.25	4.25	4.5	4.5	4.75	5	5	5.25	5.25	4.5	4.5	4.25	4.25	4.48438	0.478441
ΔrasP	6.5	6.75	7.5	7.5	7.75	8	8	8	8.25	7.5	8.25	8.75					7.72917	0.634772
ΔponA	3.75	4	4.5	4.75	5.25	4.25	4.25										4.39286	0.497015
ΔsigI	6	7	7.25														6.75	0.661438
ΔmreBH	6	7.25	8.5														7.25	1.25
ΔlytE	7.25	7.25	7.25	7.5	7.75	8.75	8.75	8.75									7.90625	0.718847
ΔsigVΔsigWΔ25ftsL	3.75	4.25	4.25	4.25	4.25	4.5	5.25	5.5	6	3.5	3.75	3.75	4				4.38462	0.754261

## Sheet: 4D-Statistical Analysis
Tukey's multiple comparisons test	Adjusted P Value
WT vs. ΔrasP	<0.0001
WT vs. ΔponA	>0.9999
WT vs. ΔsigI	<0.0001
WT vs. ΔmreBH	<0.0001
WT vs. ΔlytE	<0.0001
WT vs. ΔVΔWΔ25ftsL	0.9996
ΔrasP vs. ΔponA	<0.0001
ΔrasP vs. ΔsigI	0.2596
ΔrasP vs. ΔmreBH	0.9164
ΔrasP vs. ΔlytE	0.9969
ΔrasP vs. ΔVΔWΔ25ftsL	<0.0001
ΔponA vs. ΔsigI	<0.0001
ΔponA vs. ΔmreBH	<0.0001
ΔponA vs. ΔlytE	<0.0001
ΔponA vs. ΔVΔWΔ25ftsL	>0.9999
ΔsigI vs. ΔmreBH	0.9658
ΔsigI vs. ΔlytE	0.147
ΔsigI vs. ΔVΔWΔ25ftsL	<0.0001
ΔmreBH vs. ΔlytE	0.7588
ΔmreBH vs. ΔVΔWΔ25ftsL	<0.0001
ΔlytE vs. ΔVΔWΔ25ftsL	<0.0001

## Sheet: 4E
	gyrA	mreBH	mreBH-gyrA	mreBH gene expression	lytE	lytE-gyrA	lytE gene expression
WT_1	19.98	22.175	2.195	0.218393	20.845	0.865	0.549046
WT_2	25.785	26.64	0.855	0.552865	24.31	-1.475	2.77984
WT_3	25.255	26.635	1.38	0.384219	24.035	-1.22	2.32947
ΔrasP_1	17.47	22.47	5	0.03125	19.14	1.67	0.314253
ΔrasP_2	27.325	30.495	3.17	0.111105	27.155	-0.17	1.12506
ΔrasP_3	27.885	30.045	2.16	0.223756	27.46	-0.425	1.34257
ΔrasP_4	23.605	25.25	1.645	0.319746	24.04	0.435	0.739694
ΔsigI_1	18.64	25.42	6.78	0.00909948	20.9	2.26	0.208772
ΔsigI_2	26.895	31.345	4.45	0.0457527	27.56	0.665	0.630689
ΔsigI_3	25.25	30.17	4.92	0.0330318	26.475	1.225	0.427798
ΔsigI_4	24.73	28.11	3.38	0.0960547	25.725	0.995	0.501736
ΔponA_1	20.945	18.635	-2.31	4.95883	20.165	-0.78	1.71713
ΔponA_2	23.84	20.63	-3.21	9.25351	22.56	-1.28	2.42839
ΔponA_3	21.105	18.715	-2.39	5.24157	20.52	-0.585	1.50004
