# Supplementary material for: A regulatory pathway that selectively up-regulates elongasome function in the absence of class A PBPs
Source: eLife. 2020 Sep 8;9:e57902. doi: 10.7554/eLife.57902 (PMC7478892; doi:10.7554/eLife.57902)
Supplement: Figure 5—source data 1. [file elife-57902-fig5-data1.xlsx]

## Sheet: 5A
	Zone of Inhibition
	AVG	SD
WT	15.6786	0.952873
ΔmreBH	23	0.894427
ΔmreBH-Pspac(hy)mreBH	16.25	0.753778
ΔlytE	22.2143	0.809174
ΔlytE-Pspac(hy)lytE	19.8333	0.752773
ΔmreBHΔlytE	31.3333	0.516398
ΔmreBHΔlytE-PxylmreBH	28	0.707107
ΔmreBHΔlytE-PxylmreBH-Pspac(hy)lytE	11.5	0.547723
Biological Replicate values:															AVG	SD
WT	15	15	15	16.5	17	17	17	16	16	16	15	15	14	15	15.6786	0.952873
ΔmreBH	23	24	24	22	22	23									23	0.894427
ΔmreBH-Pspac(hy)mreBH	16	16	16	15	15	16	17	17	17	17	16	17			16.25	0.753778
ΔlytE	21.5	22	22	22	24	22	22								22.2143	0.809174
ΔlytE-Pspac(hy)lytE	19	21	19	20	20	20									19.8333	0.752773
ΔmreBHΔlytE	31	32	31	31	31	32									31.3333	0.516398
ΔmreBHΔlytE-PxylmreBH	27	28	28	28	29										28	0.707107
ΔmreBHΔlytE-PxylmreBH-Pspac(hy)lytE	12	12	11	12	11	11									11.5	0.547723

## Sheet: 5A-Statistical Analysis
Tukey's multiple comparisons test	Adjusted P Value
WT vs. mreBH	<0.0001
WT vs. ΔmreBH-Pspac(hy)mreBH	0.5964
WT vs. lytE	<0.0001
WT vs. ΔlytE-Pspac(hy)lytE	<0.0001
WT vs. ΔmreBHΔlytE	<0.0001
WT vs. ΔmreBHΔlytE-PxylmreBH	<0.0001
WT vs. ΔmreBHΔlytE-PxylmreBH-Pspac(hy)lytE	<0.0001
mreBH vs. ΔmreBH-Pspac(hy)mreBH	<0.0001
mreBH vs. lytE	0.6299
mreBH vs. ΔlytE-Pspac(hy)lytE	<0.0001
mreBH vs. ΔmreBHΔlytE	<0.0001
mreBH vs. ΔmreBHΔlytE-PxylmreBH	<0.0001
mreBH vs. ΔmreBHΔlytE-PxylmreBH-Pspac(hy)lytE	<0.0001
ΔmreBH-Pspac(hy)mreBH vs. lytE	<0.0001
ΔmreBH-Pspac(hy)mreBH vs. ΔlytE-Pspac(hy)lytE	<0.0001
ΔmreBH-Pspac(hy)mreBH vs. ΔmreBHΔlytE	<0.0001
ΔmreBH-Pspac(hy)mreBH vs. ΔmreBHΔlytE-PxylmreBH	<0.0001
ΔmreBH-Pspac(hy)mreBH vs. ΔmreBHΔlytE-PxylmreBH-Pspac(hy)lytE	<0.0001
lytE vs. ΔlytE-Pspac(hy)lytE	<0.0001
lytE vs. ΔmreBHΔlytE	<0.0001
lytE vs. ΔmreBHΔlytE-PxylmreBH	<0.0001
lytE vs. ΔmreBHΔlytE-PxylmreBH-Pspac(hy)lytE	<0.0001
ΔlytE-Pspac(hy)lytE vs. ΔmreBHΔlytE	<0.0001
ΔlytE-Pspac(hy)lytE vs. ΔmreBHΔlytE-PxylmreBH	<0.0001
ΔlytE-Pspac(hy)lytE vs. ΔmreBHΔlytE-PxylmreBH-Pspac(hy)lytE	<0.0001
ΔmreBHΔlytE vs. ΔmreBHΔlytE-PxylmreBH	<0.0001
ΔmreBHΔlytE vs. ΔmreBHΔlytE-PxylmreBH-Pspac(hy)lytE	<0.0001
ΔmreBHΔlytE-PxylmreBH vs. ΔmreBHΔlytE-PxylmreBH-Pspac(hy)lytE	<0.0001

## Sheet: 5B
	Zone of Inhibition
	AVG	SD
WT	15.6786	0.952873
ΔrasP	32.5714	0.534522
ΔrasPΔmreBH-Pspac(hy)mreBH	28.9167	0.668558
ΔrasPΔmreBHΔlytE-Pspac(hy)mreBH	34.3333	0.516398
ΔsigI	26.625	1.18773
ΔsigIΔmreBH-Pspac(hy)mreBH	28	1.09545
ΔsigIΔmreBHΔlytE-Pspac(hy)mreBH	29.8333	0.983192
Biological Replicate values:															AVG	SD
WT	15	15	15	16.5	17	17	17	16	16	16	15	15	14	15	15.6786	0.952873
ΔrasP	32	33	33	32	32	33	33								32.5714	0.534522
ΔrasPΔmreBH-Pspac(hy)mreBH	29	29	28	29	28	28	29	29	29	30	30	29			28.9167	0.668558
ΔrasPΔmreBHΔlytE-Pspac(hy)mreBH	34	34	35	35	34	34									34.3333	0.516398
ΔsigI	28	28	26	27	25	25	27	27							26.625	1.18773
ΔsigIΔmreBH-Pspac(hy)mreBH	26	28	29	28	28	29									28	1.09545
ΔsigIΔmreBHΔlytE-Pspac(hy)mreBH	29	29	30	31	29	31									29.8333	0.983192

## Sheet: Sheet4
Tukey's multiple comparisons test	Adjusted P Value
WT vs. rasP	<0.0001
WT vs. ΔrasPΔmreBH-Pspac(hy)mreBH	<0.0001
WT vs. ΔrasPΔmreBHΔlytE-Pspac(hy)mreBH	<0.0001
WT vs. sigI	<0.0001
WT vs. ΔsigIΔmreBH-Pspac(hy)mreBH	<0.0001
WT vs. ΔsigIΔmreBHΔlytE-Pspac(hy)mreBH	<0.0001
rasP vs. ΔrasPΔmreBH-Pspac(hy)mreBH	<0.0001
rasP vs. ΔrasPΔmreBHΔlytE-Pspac(hy)mreBH	0.0122
rasP vs. sigI	<0.0001
rasP vs. ΔsigIΔmreBH-Pspac(hy)mreBH	<0.0001
rasP vs. ΔsigIΔmreBHΔlytE-Pspac(hy)mreBH	<0.0001
ΔrasPΔmreBH-Pspac(hy)mreBH vs. ΔrasPΔmreBHΔlytE-Pspac(hy)mreBH	<0.0001
ΔrasPΔmreBH-Pspac(hy)mreBH vs. sigI	<0.0001
ΔrasPΔmreBH-Pspac(hy)mreBH vs. ΔsigIΔmreBH-Pspac(hy)mreBH	0.3806
ΔrasPΔmreBH-Pspac(hy)mreBH vs. ΔsigIΔmreBHΔlytE-Pspac(hy)mreBH	0.3806
ΔrasPΔmreBHΔlytE-Pspac(hy)mreBH vs. sigI	<0.0001
ΔrasPΔmreBHΔlytE-Pspac(hy)mreBH vs. ΔsigIΔmreBH-Pspac(hy)mreBH	<0.0001
ΔrasPΔmreBHΔlytE-Pspac(hy)mreBH vs. ΔsigIΔmreBHΔlytE-Pspac(hy)mreBH	<0.0001
sigI vs. ΔsigIΔmreBH-Pspac(hy)mreBH	0.0777
sigI vs. ΔsigIΔmreBHΔlytE-Pspac(hy)mreBH	<0.0001
ΔsigIΔmreBH-Pspac(hy)mreBH vs. ΔsigIΔmreBHΔlytE-Pspac(hy)mreBH	0.0119

## Sheet: 5C
WT	ΔponA	ΔrasP	ΔsigI	ΔmreBHΔlytE	ΔmreBH	ΔlytE
13.1344	12.6974	13.7641	12.0478	10.8493	12.7233	10.2691
12.4215	12.6775	13.1918	11.5855	10.8379	10.7521	9.31756
12.4118	12.3459	12.9729	11.5612	10.717	9.7252	9.21919
12.3256	11.9306	12.6062	11.4952	10.3446	9.70568	8.67556
12.2479	11.8551	12.5957	11.1845	10.1303	9.69	8.47335
12.1937	11.747	12.5576	11.164	10.0719	9.68012	8.44355
12.1324	11.7041	12.2219	11.1184	9.99467	9.46189	8.41671
12.1287	11.5886	12.0325	10.7476	9.82207	9.43506	7.53243
11.8082	11.5456	12.0272	10.694	9.79329	8.65616	7.44364
11.7288	11.4569	11.6485	10.5691	9.77041	8.31715	7.38059
11.4781	11.3521	11.6283	9.96168	9.74494	7.87317	7.27574
11.0526	11.2732	11.4948	9.89955	9.72471	7.59503	7.21405
10.9398	10.9861	11.4229	9.84506	9.57986	7.49284	7.15631
10.8126	10.9682	11.4026	9.82226	9.50486	7.34654	7.06025
10.7923	10.9163	11.3924	9.77272	9.4173	7.0914	7.02406
10.6437	10.6298	11.301	9.67862	9.40284	7.09006	7.02083
10.63	10.6136	11.1406	9.54192	9.37585	7.06591	7.00269
10.6053	10.5597	10.7598	9.48749	9.24053	7.06216	6.99068
10.5258	10.4854	10.7432	9.39846	9.23689	6.8868	6.94572
10.4667	10.3446	10.7333	9.34949	9.22148	6.71662	6.87486
10.4557	10.1259	10.2822	9.34158	9.11719	6.63846	6.8585
10.3372	10.0125	10.2588	9.32806	9.08605	6.48325	6.81858
10.2498	9.87582	10.0632	9.29356	9.07702	6.44393	6.65934
10.1237	9.79615	9.95052	9.27947	9.02844	6.21448	6.59014
9.82861	9.70504	9.84649	9.24246	9.00656	6.16243	6.46567
9.81405	9.70466	9.57909	9.23634	8.96139	6.02115	6.25991
9.80093	9.66214	9.56555	9.05005	8.87691	5.89424	6.09446
9.7873	9.6195	9.31908	9.0152	8.55417	5.8666	6.0373
9.66021	9.60369	9.31065	8.98017	8.50263	5.81003	6.01848
9.64757	9.56094	9.24993	8.9658	8.26182	5.77594	5.82292
9.61914	9.40536	8.94691	8.96152	8.24056	5.76169	5.67497
9.61793	9.3842	8.92903	8.94412	8.23645	5.6761	5.67173
9.61361	9.29864	8.8697	8.92581	8.1884	5.66158	5.65087
9.6106	9.26864	8.7888	8.89236	8.13726	5.55938	5.6484
9.57901	9.21463	8.77004	8.82688	8.12697	5.51966	5.59791
9.51727	9.19908	8.57427	8.80132	8.11731	5.48743	5.58237
9.461	9.08647	8.5583	8.77406	8.11117	5.38706	5.57444
9.33423	9.06832	8.54777	8.7725	8.10374	5.37652	5.56185
9.3265	9.06222	8.46547	8.7341	8.07493	5.36622	5.3704
9.23491	9.02727	8.39445	8.65191	8.02041	5.35231	5.36854
9.19835	9.00782	8.26412	8.44007	7.93358	5.23561	5.34542
9.14674	8.98249	8.24073	8.37814	7.88027	5.2282	5.33209
9.10744	8.86042	8.22278	8.26772	7.84277	5.21282	5.32353
9.10315	8.85638	8.14093	8.19834	7.81419	5.20451	5.31406
9.06813	8.73788	8.01348	8.1909	7.76172	5.19266	5.29738
9.02186	8.71143	7.99766	8.11436	7.73332	5.15008	5.26636
8.81263	8.69071	7.98447	8.08154	7.72773	5.13463	5.24408
8.79322	8.58851	7.8898	8.04255	7.70741	5.09425	5.22372
8.77876	8.57673	7.84061	8.03554	7.68396	5.03017	5.21848
8.59212	8.46869	7.74463	8.01956	7.67671	5.0228	5.21255
8.58912	8.46541	7.61405	7.99951	7.66197	5.00869	5.19901
8.55989	8.45886	7.58766	7.95309	7.44433	4.98672	5.19568
8.54483	8.4006	7.56113	7.92908	7.42621	4.97926	5.18706
8.51609	8.39094	7.54595	7.92467	7.40946	4.9539	5.18684
8.44277	8.30331	7.43973	7.92076	7.27375	4.93957	5.165
8.43799	8.30091	7.41779	7.90685	7.24018	4.92966	5.16204
8.27757	8.26119	7.40525	7.81639	7.20994	4.87332	5.13661
8.26562	8.25968	7.37873	7.72433	7.1964	4.85313	5.1184
8.23475	8.25672	7.36823	7.65194	7.15604	4.83647	5.08909
8.23148	8.13126	7.35363	7.5568	7.13295	4.78312	5.05521
8.21652	8.07579	7.31756	7.48789	7.13167	4.72166	5.031
8.20605	8.0538	7.30478	7.34654	7.04865	4.67058	4.98864
8.17172	7.94774	7.29638	7.34377	7.02829	4.653	4.98393
8.12553	7.93748	7.21636	7.31086	6.89356	4.61752	4.96945
8.10568	7.8966	7.12301	7.30494	6.81988	4.59513	4.94545
8.09864	7.87029	7.11649	7.19212	6.80643	4.59381	4.91704
8.04633	7.84843	7.06133	7.14979	6.79223	4.54823	4.87457
8.00775	7.78905	7.05484	7.11467	6.78815	4.54822	4.83819
8.00322	7.77771	7.05324	7.10772	6.77923	4.52734	4.82943
8.00124	7.76662	7.04953	7.06028	6.77471	4.52493	4.81338
7.98683	7.7252	7.02673	7.00653	6.74905	4.41975	4.81161
7.97229	7.63757	7.02533	6.99822	6.70966	4.39068	4.80218
7.90897	7.59788	7.01768	6.93471	6.6997	4.37148	4.80064
7.85934	7.59602	6.92228	6.89479	6.69856	4.34508	4.79803
7.84715	7.48916	6.87435	6.88847	6.68693	4.33468	4.7423
7.81477	7.45199	6.8676	6.85737	6.65669	4.29592	4.72341
7.8012	7.43008	6.8489	6.82449	6.57308	4.21521	4.6994
7.77235	7.41018	6.84245	6.79508	6.49994	4.20008	4.69938
7.71547	7.37678	6.82386	6.68893	6.49863	4.16179	4.69035
7.67422	7.2516	6.80451	6.65653	6.49064	4.13858	4.68989
7.66129	7.2371	6.80285	6.63946	6.4616	4.13368	4.6444
7.6401	7.17116	6.79547	6.63096	6.44526	4.10095	4.63686
7.57916	7.13037	6.7744	6.61915	6.42141	4.08068	4.6332
7.54723	7.12063	6.7188	6.61902	6.41911	4.07834	4.63161
7.52182	7.09125	6.69476	6.6156	6.41808	4.0033	4.58504
7.51914	7.066	6.65048	6.61057	6.34322		4.57236
7.50751	7.04073	6.64881	6.59894	6.32135		4.56051
7.41092	6.99849	6.61879	6.5505	6.28599		4.53328
7.36509	6.99347	6.59333	6.53179	6.25778		4.53039
7.34617	6.97308	6.57989	6.46835	6.22078		4.50246
7.30597	6.95647	6.51911	6.44871	6.19123		4.48938
7.29691	6.92915	6.50075	6.43825	6.17979		4.45151
7.27015	6.91869	6.50066	6.43565	6.1792		4.44416
7.24704	6.85195	6.49464	6.4147	6.08854		4.42751
7.142	6.82962	6.48669	6.40536	6.05216		4.41002
7.10795	6.81599	6.4769	6.40357	6.04692		4.38019
7.09511	6.81586	6.46495	6.3995	5.99083		4.37298
7.06765	6.80239	6.43376	6.38718	5.97539		4.37257
7.05609	6.78921	6.43368	6.36166	5.95061		4.36673
7.00172	6.77775	6.30297	6.325	5.94895		4.36532
6.9562	6.7763	6.24903	6.30989	5.91781		4.35697
6.9118	6.68644	6.24826	6.27394	5.90255		4.32994
6.74143	6.67457	6.19443	6.19991	5.87822		4.3269
6.63405	6.62024	6.15909	6.17706	5.85596		4.3001
6.50705	6.57713	6.12381	6.14281	5.82941		4.29791
6.47835	6.49739	6.11936	6.14137	5.76254		4.29386
6.43961	6.48344	5.97726	6.12328	5.73383		4.22483
6.40526	6.37572	5.96542	6.11045	5.71403		4.22378
6.35243	6.36946	5.9086	6.09664	5.66197		4.20402
6.13414	6.28744	5.90463	6.0453	5.57958		4.18953
6.09743	6.27605	5.85212	6.0428	5.57802		4.18899
6.09147	6.26471	5.84827	6.02155	5.57761		4.15941
6.0856	6.21172	5.82857	6.01211	5.57602		4.15768
5.93171	6.21015	5.81328	5.99875	5.57388		4.10281
5.89767	6.19011	5.78712	5.95763	5.51179		4.10258
5.89115	6.18181	5.75304	5.95308	5.50438		4.09537
5.79615	6.18108	5.74695	5.91235	5.46043		4.09508
5.74789	6.13387	5.71339	5.90945	5.36984		4.05908
5.73771	6.09177	5.63172	5.8842	5.35236		4.05034
5.62287	5.99131	5.60885	5.88051	5.32138		4.03446
5.56709	5.88941	5.60541	5.87487	5.31609		4.00681
5.53528	5.8402	5.58355	5.87336	5.28559		4.0018
5.5135	5.83777	5.48899	5.86565	5.27499
5.4736	5.83579	5.47783	5.8095	5.24339
5.4332	5.76009	5.46631	5.78332	5.21851
5.33024	5.74783	5.41119	5.74381	5.20781
5.29084	5.72672	5.38151	5.71023	5.13285
5.12476	5.71236	5.34311	5.70727	5.10421
5.02076	5.68838	5.29074	5.69355	5.08254
5.02067	5.67367	5.25143	5.68815	5.07401
	5.66761	5.139	5.66838	5.02477
	5.66509	5.12611	5.6243	4.93051
	5.5714	5.10402	5.56593	4.92929
	5.54778	5.10314	5.55776	4.88253
	5.53678	5.00793	5.5477	4.8692
	5.52738	4.95373	5.48175	4.8304
	5.40506	4.91943	5.47713	4.76916
	5.36728	4.6011	5.42793	4.76231
	5.34657	4.58879	5.37538	4.71989
	5.29618	4.23472	5.33634	4.67289
	5.2679	4.14082	5.31835	4.67274
	5.24935	4.10491	5.30445	4.65709
	5.20956	4.05569	5.28826	4.65093
	5.20472		5.28202	4.58003
	5.20077		5.28066	4.47279
	5.19164		5.27706	4.40052
	5.10648		5.2199	4.37788
	5.04222		5.20723	4.3624
	5.03765		5.17828	4.35055
	4.86986		5.1591	4.29713
	4.77404		5.1192	4.28894
	4.7055		5.1054	4.26545
	4.62927		5.09789
	4.59987		5.05842
	4.58505		5.05506
	4.55908		5.03307
	4.41743		5.03168
	4.21467		4.96941
	4.06506		4.95253
	4.04793		4.78984
			4.78379
			4.76176
			4.67295
			4.58228
			4.50335
			4.4978
			4.49208
			4.49036
			4.47812
			4.44766
			4.13541

## Sheet: 5C-Statistical Analysis
Tukey's multiple comparisons test	Adjusted P Value
WT vs. ΔponA	0.0171
WT vs. ΔrasP	0.0137
WT vs. ΔsigI	<0.0001
WT vs. ΔmreBHΔlytE	<0.0001
WT vs. ΔmreBH	<0.0001
WT vs. ΔlytE	<0.0001
ΔponA vs. ΔrasP	>0.9999
ΔponA vs. ΔsigI	0.0976
ΔponA vs. ΔmreBHΔlytE	0.0074
ΔponA vs. ΔmreBH	<0.0001
ΔponA vs. ΔlytE	<0.0001
ΔrasP vs. ΔsigI	0.1729
ΔrasP vs. ΔmreBHΔlytE	0.0177
ΔrasP vs. ΔmreBH	<0.0001
ΔrasP vs. ΔlytE	<0.0001
ΔsigI vs. ΔmreBHΔlytE	0.967
ΔsigI vs. ΔmreBH	<0.0001
ΔsigI vs. ΔlytE	<0.0001
ΔmreBHΔlytE vs. ΔmreBH	0.001
ΔmreBHΔlytE vs. ΔlytE	<0.0001
ΔmreBH vs. ΔlytE	0.5929

## Sheet: 5D
WT	ΔponA	ΔrasP	ΔsigI	ΔmreBHΔlytE	ΔmreBH	ΔlytE
1.04228	0.884547	1.16577	1.18118	1.25943	1.1664	0.997041
1.0224	0.860294	1.09518	1.06761	1.22871	1.1302	0.993667
1.01132	0.839763	1.04151	1.03705	1.22405	1.06148	0.989026
1.00817	0.83178	1.04033	1.02181	1.21457	1.05294	0.988997
1.00683	0.818326	1.03856	1.02138	1.21343	1.04761	0.985028
1.00426	0.808758	1.03823	1.01898	1.18674	1.0348	0.984121
0.994695	0.80831	1.02955	1.0169	1.15689	1.00581	0.983267
0.989714	0.808227	1.02953	1.01257	1.12456	0.977782	0.982832
0.982303	0.800614	1.02889	1.01235	1.11092	0.970378	0.981417
0.982268	0.797823	1.02421	1.00573	1.07421	0.969777	0.981087
0.975326	0.79179	1.02367	1.0052	1.0733	0.946813	0.979128
0.972821	0.789256	1.02238	0.997138	1.06379	0.935364	0.976649
0.972331	0.785817	1.02093	0.99659	1.03212	0.935307	0.972197
0.970306	0.776467	1.02079	0.993988	1.01956	0.923714	0.970964
0.96347	0.774635	1.01607	0.992668	1.01782	0.921843	0.968916
0.95955	0.771941	1.01198	0.991535	1.0136	0.919262	0.967557
0.956497	0.764437	1.01041	0.991283	1.01108	0.903391	0.966685
0.952557	0.763472	1.0089	0.98929	1.00776	0.894172	0.965282
0.95119	0.754147	1.00832	0.988938	1.00545	0.892684	0.96129
0.946646	0.748473	1.00722	0.9875	1.00288	0.88856	0.960199
0.945238	0.747773	1.00209	0.987037	1.00093	0.888092	0.958893
0.944126	0.747356	0.999783	0.981544	0.997738	0.881153	0.958284
0.944002	0.746906	0.996012	0.979999	0.993144	0.880444	0.956994
0.943015	0.745527	0.989082	0.978233	0.990423	0.878835	0.955398
0.935913	0.744773	0.985602	0.975143	0.990101	0.878055	0.953862
0.933678	0.743146	0.983168	0.973842	0.989985	0.877005	0.953822
0.932597	0.741196	0.983135	0.972042	0.984629	0.876953	0.952131
0.929739	0.737175	0.982194	0.971112	0.984127	0.873578	0.951894
0.923219	0.73513	0.98102	0.970731	0.98115	0.873306	0.950177
0.918834	0.731251	0.979344	0.968128	0.978262	0.872711	0.95006
0.916877	0.730831	0.979296	0.965819	0.977691	0.861812	0.947542
0.914631	0.729635	0.978259	0.964195	0.97597	0.8592	0.947539
0.913381	0.728494	0.977661	0.96419	0.975129	0.858261	0.946222
0.900165	0.72805	0.97746	0.962148	0.974503	0.85693	0.945782
0.895397	0.727642	0.976976	0.961945	0.973169	0.855514	0.943162
0.893326	0.724916	0.976673	0.959232	0.973129	0.854648	0.942664
0.887714	0.724614	0.976319	0.958704	0.970737	0.853708	0.942508
0.881079	0.724225	0.976106	0.958584	0.965949	0.853481	0.941917
0.878198	0.723789	0.975958	0.957647	0.96481	0.847144	0.940788
0.875197	0.723347	0.971817	0.954562	0.964717	0.84474	0.940601
0.874694	0.720348	0.971319	0.954147	0.964127	0.844641	0.939663
0.873771	0.718221	0.970302	0.953876	0.963178	0.844325	0.938953
0.872144	0.717315	0.969798	0.951939	0.961947	0.841669	0.934011
0.871921	0.716663	0.969305	0.950331	0.95951	0.839679	0.933318
0.867251	0.714366	0.96912	0.950002	0.957109	0.835922	0.932961
0.864494	0.713721	0.967311	0.948546	0.956646	0.833636	0.932454
0.861575	0.71239	0.966909	0.945421	0.956566	0.831702	0.931933
0.86072	0.712354	0.961373	0.94349	0.949305	0.827931	0.927711
0.856789	0.711235	0.959867	0.942943	0.946248	0.826599	0.927699
0.852234	0.710935	0.958103	0.94205	0.944879	0.826034	0.926987
0.851972	0.707537	0.957325	0.938644	0.943568	0.825736	0.921197
0.849907	0.706883	0.955343	0.93838	0.942836	0.825339	0.9201
0.848776	0.706387	0.953019	0.938342	0.942709	0.824854	0.920052
0.843676	0.706277	0.952028	0.938239	0.94111	0.824173	0.919716
0.843008	0.705619	0.950447	0.938069	0.940655	0.823122	0.918743
0.839479	0.704499	0.949435	0.937968	0.940427	0.821123	0.918532
0.83463	0.699141	0.949171	0.93646	0.936564	0.821043	0.917019
0.831503	0.698359	0.947917	0.935601	0.932473	0.815888	0.915709
0.830031	0.696122	0.946521	0.931924	0.93163	0.812618	0.909485
0.829386	0.695547	0.945644	0.929492	0.931052	0.812255	0.908528
0.825682	0.693714	0.94562	0.927054	0.927939	0.808154	0.908029
0.825212	0.693565	0.945246	0.925777	0.927482	0.807949	0.907764
0.823396	0.693231	0.945113	0.921705	0.925158	0.805482	0.906103
0.821286	0.6921	0.944603	0.919269	0.918959	0.804262	0.905295
0.821107	0.691709	0.944488	0.91878	0.915073	0.801637	0.904819
0.82073	0.691238	0.943663	0.915824	0.914341	0.800884	0.904802
0.815206	0.688254	0.94233	0.915385	0.911797	0.796156	0.902872
0.813731	0.686797	0.940458	0.913269	0.91017	0.794006	0.902707
0.812817	0.686373	0.938555	0.913107	0.908346	0.788499	0.901797
0.811412	0.685649	0.937336	0.913081	0.905938	0.787887	0.901553
0.807302	0.685029	0.932222	0.911384	0.903974	0.781724	0.898854
0.80187	0.683147	0.931475	0.910578	0.899708	0.781028	0.8982
0.796195	0.683063	0.931342	0.908292	0.898878	0.773008	0.897198
0.79365	0.682939	0.931035	0.907316	0.897705	0.77255	0.894905
0.792749	0.679761	0.930362	0.906259	0.895294	0.771088	0.892777
0.789892	0.679102	0.925045	0.902587	0.894123	0.762569	0.892262
0.787498	0.679092	0.92176	0.902215	0.891232	0.757582	0.891915
0.787242	0.6767	0.921398	0.900555	0.890255	0.75516	0.891599
0.785753	0.676642	0.921329	0.900139	0.888455	0.753593	0.891114
0.783021	0.676157	0.920085	0.894079	0.88136	0.753477	0.890053
0.778132	0.675639	0.916243	0.893691	0.880502	0.738083	0.889105
0.775679	0.674942	0.916042	0.893328	0.879674	0.734777	0.886249
0.774773	0.674434	0.915644	0.891112	0.878825	0.731263	0.885571
0.774059	0.673497	0.90974	0.890176	0.878627	0.7288	0.8825
0.770575	0.673099	0.908678	0.888519	0.878125	0.728535	0.88086
0.767364	0.672735	0.908377	0.888507	0.876441	0.72791	0.8767
0.765643	0.671612	0.908301	0.886652	0.874464	0.72656	0.876499
0.76462	0.670854	0.907548	0.886348	0.873756	0.72467	0.872168
0.764438	0.669205	0.907454	0.886303	0.872557	0.724541	0.871436
0.764084	0.669171	0.905355	0.885052	0.871109	0.718809	0.870387
0.757432	0.668585	0.899377	0.877173	0.870471	0.716109	0.869031
0.753987	0.667569	0.899336	0.876376	0.870126	0.713941	0.867271
0.751241	0.666688	0.899026	0.876177	0.869645	0.713033	0.866206
0.739753	0.666146	0.898581	0.875306	0.867551	0.707218	0.862508
0.739593	0.664641	0.895888	0.874768	0.866583	0.703572	0.862045
0.738675	0.664629	0.895752	0.874517	0.866471	0.697163	0.860744
0.73528	0.663996	0.894083	0.872914	0.861168	0.69041	0.85963
0.735204	0.6638	0.892822	0.870697	0.85941	0.652562	0.85575
0.734541	0.663489	0.89278	0.867191	0.859058	0.630863	0.855722
0.731397	0.662566	0.891395	0.866773	0.857543	0.620742	0.85163
0.730313	0.66189	0.888745	0.866367	0.857447	0.616129	0.850209
0.725858	0.661517	0.888306	0.863917	0.857116	0.569419	0.848159
0.721388	0.660386	0.887584	0.863674	0.853654	0.565614	0.836006
0.720197	0.658475	0.885527	0.863281	0.841112	0.559108	0.834876
0.717937	0.658439	0.884685	0.862748	0.836881	0.540063	0.833822
0.710191	0.658215	0.883683	0.861336	0.836622	0.533618	0.833539
0.7101	0.657753	0.880637	0.861065	0.835109	0.502461	0.822067
0.709861	0.657313	0.879163	0.857675	0.830371		0.820413
0.709612	0.65652	0.876662	0.857658	0.829816		0.818403
0.707588	0.655483	0.873439	0.856832	0.828641		0.814411
0.706867	0.654948	0.871771	0.856068	0.82823		0.80901
0.700842	0.654798	0.871171	0.855019	0.827963		0.808344
0.70057	0.654595	0.870297	0.853118	0.827653		0.807613
0.699678	0.653772	0.869765	0.853079	0.824628		0.806317
0.695426	0.648845	0.868907	0.852546	0.822939		0.80047
0.683886	0.647915	0.867286	0.847025	0.819774		0.800406
0.681339	0.647817	0.866846	0.843947	0.815022		0.793104
0.680909	0.647067	0.866676	0.842066	0.806825		0.792944
0.678442	0.64697	0.86538	0.839115	0.806601		0.78895
0.677952	0.645557	0.865088	0.838995	0.801607		0.78244
0.674334	0.644509	0.864883	0.837306	0.799574		0.781923
0.67092	0.640255	0.86351	0.836124	0.798251		0.78155
0.668055	0.639391	0.862744	0.830214	0.795985		0.781085
0.667635	0.639314	0.862655	0.829308	0.792896		0.780295
0.666291	0.639248	0.861732	0.827279	0.791386		0.776436
0.659011	0.638561	0.861099	0.82356	0.78297		0.771497
0.653918	0.638447	0.861041	0.82251	0.781796		0.770334
0.647761	0.637686	0.859289	0.820994	0.763398		0.769776
0.640772	0.636176	0.858017	0.817498	0.761051		0.764189
0.633463	0.636006	0.857048	0.817112	0.753181		0.762548
0.6329	0.634327	0.856326	0.816855	0.748316		0.760838
0.629071	0.634304	0.855668	0.81519	0.738477		0.76028
0.624898	0.633187	0.853272	0.813319	0.733321		0.756444
0.615371	0.631657	0.849054	0.813147	0.726206		0.742258
0.591551	0.630996	0.848336	0.808402	0.724479		0.740187
0.589835	0.629734	0.847289	0.807725	0.723483		0.726934
0.580135	0.62952	0.846853	0.806077	0.71781		0.707064
0.577612	0.627341	0.843886	0.805281	0.715615		0.695795
0.577225	0.627	0.84342	0.804321	0.715199		0.684976
0.549822	0.626754	0.840955	0.804157	0.713318		0.684189
0.5454	0.626701	0.839675	0.797297	0.712121		0.66828
0.527152	0.625019	0.834995	0.796488	0.708591		0.611425
0.527132	0.624812	0.834779	0.792544	0.699676		0.566314
	0.624763	0.833879	0.789067	0.6837		0.544517
	0.618771	0.828715	0.780969	0.679807		0.536678
	0.618032	0.826757	0.777956	0.679393
	0.616389	0.825213	0.773359	0.662538
	0.615836	0.824773	0.771596	0.65158
	0.61567	0.820623	0.764884	0.651319
	0.612725	0.819208	0.763525	0.649888
	0.610554	0.819162	0.758905	0.6465
	0.610276	0.818825	0.75747	0.638346
	0.607475	0.817739	0.756397	0.628436
	0.607206	0.817498	0.754276	0.603493
	0.606489	0.816399	0.749722	0.591164
	0.598758	0.813067	0.748923	0.588069
	0.593607	0.81084	0.746988	0.581329
	0.590686	0.808866	0.741161	0.570913
	0.579813	0.807829	0.739098	0.525488
	0.578863	0.80682	0.73201
	0.573575	0.805339	0.726707
	0.573188	0.804678	0.722194
	0.569361	0.80398	0.720971
	0.565939	0.802223	0.719406
	0.557852	0.796178	0.708404
	0.547271	0.796135	0.70715
	0.546952	0.795761	0.702803
	0.545965	0.795746	0.693614
	0.54565	0.793143	0.692906
	0.538503	0.793066	0.687558
		0.78929	0.684559
		0.781568	0.683599
		0.776223	0.683588
		0.77435	0.678963
		0.772486	0.6711
		0.771918	0.668939
		0.765534	0.660285
		0.760807	0.654265
		0.755168	0.651754
		0.753288	0.647378
		0.750754	0.647323
		0.749018	0.641289
		0.748436	0.638234
		0.743494	0.628842
		0.742008	0.62121
		0.729908	0.59835
		0.729019	0.597464
		0.726433	0.549743
		0.724227	0.51833
		0.719829
		0.70508
		0.703895
		0.694967
		0.665361
		0.654334

## Sheet: 5D-Statistical Analysis
Tukey's multiple comparisons test	Adjusted P Value
WT vs. ΔponA	<0.0001
WT vs. ΔrasP	<0.0001
WT vs. ΔsigI	<0.0001
WT vs. ΔmreBHΔlytE	<0.0001
WT vs. ΔmreBH	0.9511
WT vs. ΔlytE	<0.0001
ΔponA vs. ΔrasP	<0.0001
ΔponA vs. ΔsigI	<0.0001
ΔponA vs. ΔmreBHΔlytE	<0.0001
ΔponA vs. ΔmreBH	<0.0001
ΔponA vs. ΔlytE	<0.0001
ΔrasP vs. ΔsigI	0.0491
ΔrasP vs. ΔmreBHΔlytE	0.9597
ΔrasP vs. ΔmreBH	<0.0001
ΔrasP vs. ΔlytE	0.7354
ΔsigI vs. ΔmreBHΔlytE	0.5202
ΔsigI vs. ΔmreBH	0.0099
ΔsigI vs. ΔlytE	0.882
ΔmreBHΔlytE vs. ΔmreBH	<0.0001
ΔmreBHΔlytE vs. ΔlytE	0.9982
ΔmreBH vs. ΔlytE	0.0003
