# Supplementary material for: A regulatory pathway that selectively up-regulates elongasome function in the absence of class A PBPs
Source: eLife. 2020 Sep 8;9:e57902. doi: 10.7554/eLife.57902 (PMC7478892; doi:10.7554/eLife.57902)
Supplement: Figure 6—source data 1. [file elife-57902-fig6-data1.xlsx]

## Sheet: 6C
	Zone of Inhibition
	AVG	SD
WT	15.6786	0.952873
walK*	33.2222	1.89599
ΔrasP	32.5714	0.534522
walK*ΔrasP	21.5	1.19523
ΔsigI	26.625	1.18773
walK*ΔsigI	31.5556	1.74005
Biological Replicate values:																			AVG	SD
WT	15	15	15	16.5	17	17	17	16	16	16	15	15	14	15					15.6786	0.952873
walK*	32	31	32	35	35	35	32	34	32	32	36	32	34	29	32	35	35	35	33.2222	1.89599
ΔrasP	32	33	33	32	32	33	33												32.5714	0.534522
walK*ΔrasP	21	21	21	22	22	21	24	20											21.5	1.19523
ΔsigI	28	28	26	27	25	25	27	27											26.625	1.18773
walK*ΔsigI	33	34	33	29	32	31	32	29	31										31.5556	1.74005

## Sheet: 6C-Statistical Analysis
Tukey's multiple comparisons test	Adjusted P Value
WT vs. walK*	<0.0001
WT vs. rasP	<0.0001
WT vs. walK*ΔrasP	<0.0001
WT vs. sigI	<0.0001
WT vs. walK*ΔsigI	<0.0001
walK* vs. rasP	0.909
walK* vs. walK*ΔrasP	<0.0001
walK* vs. sigI	<0.0001
walK* vs. walK*ΔsigI	0.0631
rasP vs. walK*ΔrasP	<0.0001
rasP vs. sigI	<0.0001
rasP vs. walK*ΔsigI	0.7215
walK*ΔrasP vs. sigI	<0.0001
walK*ΔrasP vs. walK*ΔsigI	<0.0001
sigI vs. walK*ΔsigI	<0.0001

## Sheet: 6D
	gyrA	mreBH	mreBH-gyrA	mreBH gene expression	lytE	lytE-gyrA	lytE gene expression
walK*_1	23.63	21.375	-2.255	4.77334	23.37	-0.26	1.19748
walK*_2	23.94	22.88	-1.06	2.08493
walK*_3	20.075	19.075	-1	2	20.41	0.335	0.792784
walK*_4	22.235	20.32	-1.915	3.77114	20.59	-1.645	3.12748
walK*_5	19.93				20.075	0.145	0.904379
	gyrA	mreBH	mreBH-gyrA	mreBH gene expression	lytE	lytE-gyrA	lytE gene expression
W*rasP_1	21.135	20.695	-0.44	1.3566	21.865	0.73	0.602904
W*rasP_2	23.64	23.15	-0.49	1.40444	24.595	0.955	0.515842
W*rasP_3	22.795	21.87	-0.925	1.89868	23.815	1.02	0.493116
W*rasP_4	20.875	20.325	-0.55	1.46409	21.92	1.045	0.484645
	gyrA	mreBH	mreBH-gyrA	mreBH gene expression	lytE	lytE-gyrA	lytE gene expression
W*SigI_1	26.01	27.7	1.69	0.309927	28.45	2.44	0.184284
W*SigI_2	18.985	21.64	2.655	0.158769	21.09	2.105	0.232451
W*SigI_3	20.145	22.6	2.455	0.182378	22.04	1.895	0.268874
W*SigI_4	25.625	27.275	1.65	0.31864	27.335	1.71	0.30566
