# Supplementary material for: A regulatory pathway that selectively up-regulates elongasome function in the absence of class A PBPs
Source: eLife. 2020 Sep 8;9:e57902. doi: 10.7554/eLife.57902 (PMC7478892; doi:10.7554/eLife.57902)
Supplement: Figure 7—source data 1. [file elife-57902-fig7-data1.xlsx]

## Sheet: 7A
	Zone of Inhibition
	AVG	SD
WT	15.6786	0.952873
ΔsigM	24.3	1.09545
PM*rodA	23.4	1.14018
PM*maf	17.4	0.894427
PM*rodA-PM*maf	24	0.894427
PM*ponA	16	0.632456
Biological Replicate values:															AVG	SD
WT	15	15	15	16.5	17	17	17	16	16	16	15	15	14	15	15.6786	0.952873
ΔsigM	26	24	24	23	24.5										24.3	1.09545
PM*rodA	25	24	23	23	22										23.4	1.14018
PM*maf	18	17	18	16	18										17.4	0.894427
PM*rodA-PM*maf	25	24	25	23	23	24									24	0.894427
PM*ponA	16	16	15	16	16	17									16	0.632456

## Sheet: 7A-Statistical Analysis
Tukey's multiple comparisons test	Adjusted P Value
WT vs. ΔsigM	<0.0001
WT vs. PM*rodA	<0.0001
WT vs. PM*maf	0.0146
WT vs. PM*rodA-PM*maf	<0.0001
WT vs. PM*ponA	0.9807
ΔsigM vs. PM*rodA	0.6591
ΔsigM vs. PM*maf	<0.0001
ΔsigM vs. PM*rodA-PM*maf	0.9947
ΔsigM vs. PM*ponA	<0.0001
PM*rodA vs. PM*maf	<0.0001
PM*rodA vs. PM*rodA-PM*maf	0.8963
PM*rodA vs. PM*ponA	<0.0001
PM*maf vs. PM*rodA-PM*maf	<0.0001
PM*maf vs. PM*ponA	0.1652
PM*rodA-PM*maf vs. PM*ponA	<0.0001

## Sheet: 7B
	Zone of Inhibition
	AVG	SD
WT	15.6786	0.952873
ΔsigM	24.3	1.09545
ΔecsA	33.75	1.5
ΔecsAΔsigM	40.4	1.67332
ΔrasP	32.5714	0.534522
ΔrasPΔsigM	37.5	1.51658
ΔsigI	26.625	1.18773
ΔsigIΔsigM	38.75	0.957427
Biological Replicate values:															AVG	SD
WT	15	15	15	16.5	17	17	17	16	16	16	15	15	14	15	15.6786	0.952873
ΔsigM	26	24	24	23	24.5										24.3	1.09545
ΔecsA	33	35	35	32											33.75	1.5
ΔecsAΔsigM	40	38	42	42	40										40.4	1.67332
ΔrasP	32	33	33	32	32	33	33								32.5714	0.534522
ΔrasPΔsigM	37	38	38	40	36	36									37.5	1.51658
ΔsigI	28	28	26	27	25	25	27	27							26.625	1.18773
ΔsigIΔsigM	39	40	38	38											38.75	0.957427

## Sheet: 7B-Statistical AnalysisTukey's 
Tukey's multiple comparisons test	Adjusted P Value
WT vs. ΔsigM	<0.0001
WT vs. ΔecsA	<0.0001
WT vs. ΔecsAΔsigM	<0.0001
WT vs. ΔrasP	<0.0001
WT vs. ΔrasPΔsigM	<0.0001
WT vs. ΔsigI	<0.0001
WT vs. ΔsigIΔsigM	<0.0001
ΔsigM vs. ΔecsA	<0.0001
ΔsigM vs. ΔecsAΔsigM	<0.0001
ΔsigM vs. ΔrasP	<0.0001
ΔsigM vs. ΔrasPΔsigM	<0.0001
ΔsigM vs. ΔsigI	0.0205
ΔsigM vs. ΔsigIΔsigM	<0.0001
ΔecsA vs. ΔecsAΔsigM	<0.0001
ΔecsA vs. ΔrasP	0.7341
ΔecsA vs. ΔrasPΔsigM	0.0002
ΔecsA vs. ΔsigI	<0.0001
ΔecsA vs. ΔsigIΔsigM	<0.0001
ΔecsAΔsigM vs. ΔrasP	<0.0001
ΔecsAΔsigM vs. ΔrasPΔsigM	0.0035
ΔecsAΔsigM vs. ΔsigI	<0.0001
ΔecsAΔsigM vs. ΔsigIΔsigM	0.4164
ΔrasP vs. ΔrasPΔsigM	<0.0001
ΔrasP vs. ΔsigI	<0.0001
ΔrasP vs. ΔsigIΔsigM	<0.0001
ΔrasPΔsigM vs. ΔsigI	<0.0001
ΔrasPΔsigM vs. ΔsigIΔsigM	0.7048
ΔsigI vs. ΔsigIΔsigM
